# Supplementary material for: Use of mixed Li/K metal TMP amide (LiNK chemistry) for the synthesis of [2.2]metacyclophanes
Source: publisher site journal article supplement (doi:10.3762/bjoc.7.145), 2011-09-09
Supplement: Additional file 1 [file 1860-5397-7-145-S1.pdf]

**Supporting Information**  
for  
**Use of mixed Li/K metal TMP amide (LiNK chemistry)**  
**for the synthesis of [2.2]metacyclophanes**

*Marco Blangetti, Patricia Fleming and Donal F. O'Shea\**

Centre for Synthesis and Chemical Biology, School of Chemistry and Chemical Biology,  
University College Dublin, Belfield, Dublin 4, Ireland

Email: Donal F. O'Shea - donal.f.oshea@ucd.ie

\* Corresponding author

All experimental details,  $^1\text{H}$  and  $^{13}\text{C}$  NMR spectra for compounds **6a-f** and **8a-f** and X-ray crystallographic data for **8c**.

**Table of Contents**

|                                                                                                                    |         |
|--------------------------------------------------------------------------------------------------------------------|---------|
| Experimental and references                                                                                        | S2–S9   |
| $^1\text{H}$ and $^{13}\text{C}$ NMR spectra of <b>6a-6f</b>                                                       | S10–S15 |
| $^1\text{H}$ and $^{13}\text{C}$ NMR spectra of <b>8a-8f</b>                                                       | S16–S21 |
| Synthesis and analysis of compounds <b>D<sub>1</sub>-4e</b> and <b>D<sub>2</sub>-6f</b>                            | S22     |
| $^1\text{H}$ , $^{13}\text{C}$ and $^2\text{H}$ NMR spectra of <b>D<sub>1</sub>-4e</b> and <b>D<sub>2</sub>-6f</b> | S23–S26 |
| X-Ray structural data for <b>8c</b>                                                                                | S27–S30 |

## Experimental

**General Methods:** All reactions involving air-sensitive reagents were performed under nitrogen in oven-dried glassware using syringe-septum cap technique. All solvents were purified and degassed before use. Chromatographic separations were carried out under pressure on Merck silica gel 60 using flash-column techniques. Reactions were monitored by thin-layer chromatography (TLC) carried out on 0.25 mm silica gel coated aluminium plates (60 Merck F<sub>254</sub>) with UV light (254 nm) as visualizing agent. Unless specified, all reagents were used as received without further purifications. TMP(H) was distilled from CaH<sub>2</sub> prior to use and THF was obtained from a solvent purification system. BuLi was purchased as a 2.5 M solution in hexanes. KO*t*-Bu was purchased as a 1 M solution in THF. The exact concentration of the organolithium solution was determined by titration with diphenylacetic acid in THF prior to use [1]. <sup>1</sup>H NMR and <sup>13</sup>C NMR spectra were recorded at room temperature at 500 MHz and 125 MHz respectively and calibrated using residual undeuterated solvent as an internal reference. <sup>2</sup>H NMR (92.07 MHz) spectra were obtained in CH<sub>2</sub>Cl<sub>2</sub> using residual CD<sub>2</sub>Cl<sub>2</sub> as an internal standard.

**1,2-Di-*m*-tolylethane (6a)** [2]. A solution of *m*-xylene (**4a**) (159 mg, 1.50 mmol) in THF (15 mL) at –78 °C was treated dropwise with BuLi (2.50 M, 0.66 mL, 1.65 mmol) and stirred for 5 min. KO*t*-Bu (1.0 M in THF, 1.65 mL, 1.65 mmol) was added dropwise followed by 2,2,6,6-tetramethylpiperidine (0.25 mL, 1.50 mmol). The reaction mixture was stirred for 15 min at –78 °C, 1,2-dibromoethane (0.39 mL, 4.50 mmol) added and stirred for a further 5 min. The reaction mixture was warmed to rt and the solvent was removed under reduced pressure. Diethyl ether (30 mL) was added to the residue, washed with HCl (2 M, 3 x 10 mL), dried over sodium sulphate and concentrated to dryness. Purification by silica gel chromatography eluting with cyclohexane gave **6a** as a colourless oil (*R*<sub>f</sub> = 0.70, 144 mg, 91%). <sup>1</sup>H NMR (500 MHz, CDCl<sub>3</sub>) δ 7.20-7.14 (m, 2H),

7.04–6.96 (m, 6H), 2.86 (s, 4H), 2.33 (s, 6H);  $^{13}\text{C}$  NMR (125 MHz,  $\text{CDCl}_3$ )  $\delta$  141.9, 137.9, 129.2, 128.2, 126.6, 125.4, 38.0, 21.4; HRMS  $[\text{M}]^+$ : 210.1411,  $\text{C}_{16}\text{H}_{18}$  requires 210.1409.

**1,2-Bis(3,5-dimethylphenyl)ethane (6b)** [3]. A solution of mesitylene (**4b**) (180 mg, 1.50 mmol) in THF (15 mL) at  $-78\text{ }^\circ\text{C}$  was treated dropwise with BuLi (2.50 M, 0.66 mL, 1.65 mmol) and stirred for 5 min. KO $t$ -Bu (1.0 M in THF, 1.65 mL, 1.65 mmol) was added dropwise followed by 2,2,6,6-tetramethylpiperidine (0.25 mL, 1.50 mmol). The reaction mixture was stirred for 15 min at  $-78\text{ }^\circ\text{C}$ , 1,2-dibromoethane (0.39 mL, 4.50 mmol) added and stirred for a further 5 min. The reaction mixture was warmed to rt and the solvent was removed under reduced pressure. Diethyl ether (30 mL) was added to the residue, washed with HCl (2 M, 3 x 10 mL), dried over sodium sulphate and concentrated to dryness. Purification by silica gel chromatography eluting with cyclohexane gave **6b** as a white solid ( $R_f$  = 0.65, 128 mg, 72%).  $^1\text{H}$  NMR (500 MHz,  $\text{CDCl}_3$ )  $\delta$  6.85 (s, 6H), 2.81 (s, 4H), 2.30 (s, 12H);  $^{13}\text{C}$  NMR (125 MHz,  $\text{CDCl}_3$ )  $\delta$  142.2, 137.9, 127.69, 127.0, 126.3, 38.2, 21.4; HRMS  $[\text{M}]^+$ : 238.1716,  $\text{C}_{18}\text{H}_{22}$  requires 238.1722.

**1,2-Bis(3-methoxy-5-methylphenyl)ethane (6c)**. A solution of 1-methoxy-3,5-dimethylbenzene (**4c**) (204 mg, 1.50 mmol) in THF (15 mL) at  $-78\text{ }^\circ\text{C}$  was treated dropwise with BuLi (2.40 M, 0.69 mL, 1.65 mmol) and stirred for 5 min. KO $t$ -Bu (1.0 M in THF, 1.65 mL, 1.65 mmol) was added dropwise followed by 2,2,6,6-tetramethylpiperidine (0.25 mL, 1.50 mmol). The reaction mixture was stirred for 15 min at  $-78\text{ }^\circ\text{C}$ , 1,2-dibromoethane (0.39 mL, 4.50 mmol) added and stirred for a further 5 min. The reaction mixture was warmed to rt and the solvent was removed under reduced pressure. Diethyl ether (30 mL) was added to the residue, washed with HCl (2 M, 3 x 10 mL), dried over sodium sulphate and concentrated to dryness. Purification by silica gel chromatography eluting with 98:2 cyclohexane:EtOAc gave **6c** as a white solid ( $R_f$  = 0.50, 186 mg, 92%).  $^1\text{H}$  NMR (500 MHz,  $\text{CDCl}_3$ )  $\delta$  6.65 (s, 2H), 6.58–6.57 (m, 4H), 3.78 (s, 6H), 2.85 (s, 4H), 2.32 (s, 6H);  $^{13}\text{C}$  NMR (125 MHz,  $\text{CDCl}_3$ )  $\delta$  159.69, 143.30, 139.28, 121.75, 112.19, 111.11, 55.11, 37.94, 21.50; HRMS

[M + Na]<sup>+</sup>: 293.1510, C<sub>18</sub>H<sub>22</sub>O<sub>2</sub>Na requires 293.1517; Analysis calcd for C<sub>18</sub>H<sub>22</sub>O<sub>2</sub>: C, 79.96; H, 8.20. Found: C, 79.68; H, 8.26.

**5,5'-(Ethane-1,2-diyl)bis(*N,N*,3-trimethylaniline) (6d).** A solution of (3,5-dimethylphenyl)dimethylamine (**4d**) (224 mg, 1.50 mmol) in THF (15 mL) at −78 °C was treated dropwise with BuLi (2.40 M, 0.69 mL, 1.65 mmol) and stirred for 5 min. KO<sup>*t*</sup>-Bu (1.0 M in THF, 1.65 mL, 1.65 mmol) was added dropwise followed by 2,2,6,6-tetramethylpiperidine (0.25 mL, 1.50 mmol). The reaction mixture was stirred for 15 min at −78 °C, 1,2-dibromoethane (0.39 mL, 4.50 mmol) added and stirred for a further 5 min. The reaction mixture was warmed to rt and the solvent was removed under reduced pressure. Diethyl ether (30 mL) was added to the residue, washed with HCl (2 M, 3 x 10 mL), dried over sodium sulphate and concentrated to dryness. Purification by silica gel chromatography eluting with 9:1 pentane:EtOAc gave **6d** as a yellow solid (*R*<sub>f</sub> = 0.40, 110 mg, 49%). <sup>1</sup>H NMR (500 MHz, CDCl<sub>3</sub>) δ 6.48 (s, 2H), 6.43 (s, 2H), 6.42 (s, 2H), 2.91 (s, 12H), 2.83 (s, 4H), 2.30 (s, 6H); <sup>13</sup>C NMR (125 MHz, CDCl<sub>3</sub>) δ 151.0, 143.0, 138.6, 118.1, 111.3, 110.3, 40.8, 38.7, 21.9; HRMS [M]<sup>+</sup>: 296.2249, C<sub>20</sub>H<sub>28</sub>N<sub>2</sub> requires 296.2252; Analysis calcd for C<sub>20</sub>H<sub>28</sub>N<sub>2</sub>: C, 81.03; H, 9.52; N, 9.45. Found: C, 80.84; H, 9.69; N, 9.19.

**1-Methoxy-3-methyl-5-(3-methylphenethyl)benzene (6e).** A solution of *m*-xylene (**4a**) (159 mg, 1.50 mmol) and 1-methoxy-3,5-dimethylbenzene (**4c**) (204 mg, 1.50 mmol) in THF (25 mL) at −78 °C was treated dropwise with BuLi (2.50 M, 1.20 mL, 3.00 mmol) and stirred for 5 min. KO<sup>*t*</sup>-Bu (1.0 M in THF, 3.00 mL, 3.00 mmol) was added dropwise followed by 2,2,6,6-tetramethylpiperidine (0.51 mL, 3.00 mmol). The reaction mixture was stirred for 15 min at −78 °C, 1,2-dibromoethane (0.52 mL, 6.00 mmol) added and stirred for a further 5 min. The reaction mixture was warmed to rt and the solvent was removed under reduced pressure. Diethyl ether (30 mL) was added to the residue, washed with HCl (2 M, 3 x 10 mL), dried over sodium sulphate and concentrated to dryness. Purification by silica gel chromatography eluting with 98:2 pentane:diethyl

ether gave **6e** as a colourless oil ( $R_f = 0.65$ , 79 mg, 22%).  $^1\text{H}$  NMR (500 MHz,  $\text{CDCl}_3$ )  $\delta$  7.17 (t,  $J = 7.5$  Hz, 1H), 7.05–6.98 (m, 3H), 6.63 (s, 1H), 6.56 (d,  $J = 7.5$  Hz, 2H), 3.76 (s, 3H), 2.85 (br s, 4H), 2.33 (s, 3H), 2.30 (s, 3H);  $^{13}\text{C}$  NMR (125 MHz,  $\text{CDCl}_3$ )  $\delta$  159.7, 143.4, 141.9, 139.3, 137.9, 129.2, 128.2, 126.6, 125.4, 121.8, 112.2, 111.1, 55.1, 38.1, 37.9, 21.5, 21.4; HRMS  $[\text{M} + \text{H}]^+$ : 241.1595,  $\text{C}_{17}\text{H}_{21}\text{O}$  requires 241.1592.

**4-Methyl-2-(3-methylphenethyl)benzoic acid (6f)** [4]. A solution of *m*-xylene (**4a**) (159 mg, 1.50 mmol) and 2,4-dimethylbenzoic acid (**4e**) (225 mg, 1.50 mmol) in THF (25 mL) at  $-78$  °C was treated dropwise with BuLi (2.50 M, 1.86 mL, 4.65 mmol) and stirred for 5 min. KO*t*-Bu (1.0 M in THF, 4.65 mL, 4.65 mmol) was added dropwise followed by 2,2,6,6-tetramethylpiperidine (0.51 mL, 3.00 mmol). The reaction mixture was stirred for 15 min at  $-78$  °C, 1,2-dibromoethane (0.52 mL, 6.00 mmol) added and stirred for a further 5 min. The reaction mixture was warmed to rt and the solvent was removed under reduced pressure. Diethyl ether (30 mL) was added to the residue, washed with HCl (2 M, 3 x 10 mL), dried over sodium sulphate and concentrated to dryness. Purification by silica gel chromatography eluting with 70:30 cyclohexane:EtOAc gave **6f** as a white solid ( $R_f = 0.50$ , 47 mg, 13%).  $^1\text{H}$  NMR (500 MHz,  $\text{CDCl}_3$ )  $\delta$  11.88 (br s, 1H), 8.01 (d,  $J = 8.0$  Hz, 1H), 7.17 (t,  $J = 7.5$  Hz, 1H), 7.11 (d,  $J = 8.0$  Hz, 1H), 7.09–7.03 (m, 3H), 7.00 (d,  $J = 7.5$  Hz, 1H), 3.32–3.25 (m, 2H), 2.92–2.85 (m, 2H), 2.37 (s, 3H), 2.32 (s, 3H);  $^{13}\text{C}$  NMR (125 MHz,  $\text{CDCl}_3$ )  $\delta$  172.8, 145.2, 143.7, 142.1, 137.8, 132.3, 132.0, 129.4, 128.2, 127.0, 126.6, 125.5, 38.1, 37.2, 21.5, 21.4; HRMS  $[\text{M}-\text{H}]^+$ : 253.1234,  $\text{C}_{17}\text{H}_{17}\text{O}_2$  requires 253.1229.

**[2.2]Metacyclophane (8a)** [5]. A solution of 1,2-di-*m*-tolylethane (**6a**) (79 mg, 0.38 mmol) in THF (15 mL) at  $-78$  °C was treated dropwise with BuLi (2.40 M, 0.35 mL, 0.83 mmol) and stirred for 5 min. KO*t*-Bu (1.0 M in THF, 0.83 mL, 0.83 mmol) was added dropwise followed by 2,2,6,6-tetramethylpiperidine (0.13 mL, 0.75 mmol). The reaction mixture was stirred for 30 min during which time the temperature was raised to  $-60$  °C. Afterwards 1,2-dibromoethane (97  $\mu\text{L}$ , 1.13

mmol) was added, the reaction mixture was warmed to rt and the solvent was removed under reduced pressure. Diethyl ether (30 mL) was added to the residue, washed with HCl (2 M, 3 x 10 mL), dried over sodium sulphate and concentrated to dryness. Purification by silica gel chromatography eluting with 99:1 cyclohexane:EtOAc gave **8a** as a white solid ( $R_f$  = 0.80, 31 mg, 40%).  $^1\text{H}$  NMR (500 MHz,  $\text{CDCl}_3$ )  $\delta$  7.27 (t,  $J$  = 7.5 Hz, 2H), 7.06 (dd,  $J$  = 7.5, 1.5 Hz, 4H), 4.27 (s, 2H), 3.14–3.04 (m, 4H), 2.15–2.03 (m, 4H);  $^{13}\text{C}$  NMR (125 MHz,  $\text{CDCl}_3$ ):  $\delta$  138.9, 136.5, 128.8, 125.4, 40.9; HRMS  $[\text{M}]^+$ : 208.1254,  $\text{C}_{16}\text{H}_{16}$  requires 208.1252.

**5,13-Dimethyl[2.2]metacyclophane (8b)** [6]. A solution of 1,2-bis(3,5-dimethylphenyl)ethane (**6b**) (144 mg, 0.61 mmol) in THF (20 mL) at  $-78^\circ\text{C}$  was treated dropwise with BuLi (2.50 M, 0.48 mL, 1.22 mmol) and stirred for 5 min. KO $t$ -Bu (1.0 M in THF, 1.22 mL, 1.22 mmol) was added dropwise followed by 2,2,6,6-tetramethylpiperidine (0.21 mL, 1.22 mmol). The reaction mixture was stirred for 30 min during which time the temperature was raised to  $-60^\circ\text{C}$ . Afterwards 1,2-dibromoethane (0.16 mL, 1.82 mmol) was added, the reaction mixture was warmed to rt and the solvent was removed under reduced pressure. Diethyl ether (30 mL) was added to the residue, washed with HCl (2 M, 3 x 10 mL), dried over sodium sulphate and concentrated to dryness. Purification by silica gel chromatography eluting with 99:1 cyclohexane:chloroform gave **8b** as a white solid ( $R_f$  = 0.70, 77 mg, 54%).  $^1\text{H}$  NMR (500 MHz,  $\text{CDCl}_3$ )  $\delta$  6.86 (s, 4H), 4.15 (s, 2H), 3.09–2.93 (m, 4H), 2.36 (s, 6H), 2.15–2.01 (m, 4H);  $^{13}\text{C}$  NMR (125 MHz,  $\text{CDCl}_3$ )  $\delta$  139.0, 138.2, 134.1, 126.1, 40.8, 21.4; HRMS  $[\text{M}]^+$ : 236.1570,  $\text{C}_{18}\text{H}_{20}$  requires 236.1565.

**5,13-Dimethoxy[2.2]metacyclophane (8c)** [7]. A solution of 1,2-bis(3-methoxy-5-methylphenyl)ethane (**6c**) (197 mg, 0.73 mmol) in THF (30 mL) at  $-78^\circ\text{C}$  was treated dropwise with BuLi (2.50 M, 0.64 mL, 1.61 mmol) and stirred for 5 min. KO $t$ -Bu (1.0 M in THF, 1.61 mL, 1.61 mmol) was added dropwise followed by 2,2,6,6-tetramethylpiperidine (0.25 mL, 1.46 mmol). The reaction mixture was stirred for 30 min during which time the temperature was raised to  $-60^\circ\text{C}$

°C. Afterwards 1,2-dibromoethane (0.19 mL, 2.19 mmol) was added, the reaction mixture was warmed to rt and the solvent was removed under reduced pressure. Diethyl ether (30 mL) was added to the residue, washed with HCl (2 M, 3 x 10 mL), dried over sodium sulphate and concentrated to dryness. Purification by silica gel chromatography eluting with 94:6 pentane:EtOAc gave **8c** as a white solid ( $R_f$  = 0.70, 65 mg, 33%).  $^1\text{H}$  NMR (500 MHz,  $\text{CDCl}_3$ )  $\delta$  6.62 (s, 4H), 4.08 (s, 2H), 3.83 (s, 6H), 3.06–2.96 (m, 4H), 2.18–2.08 (m, 4H);  $^{13}\text{C}$  NMR (125 MHz,  $\text{CDCl}_3$ )  $\delta$  160.5, 140.4, 129.5, 110.8, 55.3, 41.0; HRMS  $[\text{M}]^+$ : 268.1460,  $\text{C}_{18}\text{H}_{20}\text{O}_2$  requires 268.1463. A slow evaporation of a diethyl ether solution gave crystals suitable for X-ray structural analysis [8].

**5,13-Bis(dimethylamino)[2.2]metacyclophane (8d)** [9]. A solution of 5,5'-(ethane-1,2-diyl)bis(*N,N*,3-trimethylaniline) (**6d**) (110 mg, 0.37 mmol) in THF (15 mL) at  $-78^\circ\text{C}$  was treated dropwise with BuLi (2.50 M, 0.33 mL, 0.82 mmol) and stirred for 5 min. KO $t$ -Bu (1.0 M in THF, 0.82 mL, 0.82 mmol) was added dropwise followed by 2,2,6,6-tetramethylpiperidine (0.14 mL, 0.82 mmol). The reaction mixture was stirred for 30 min during which time the temperature was raised to  $-60^\circ\text{C}$ . Afterwards 1,2-dibromoethane (0.10 mL, 1.15 mmol) was added, the reaction mixture was warmed to rt and the solvent was removed under reduced pressure. Diethyl ether (30 mL) was added to the residue, washed with HCl (2 M, 3 x 10 mL), dried over sodium sulphate and concentrated to dryness. Purification by crystallization from methanol gave **8d** as a pale yellow solid (47 mg, 43%).  $^1\text{H}$  NMR (500 MHz,  $\text{CDCl}_3$ )  $\delta$  6.46 (s, 4H), 4.04 (s, 2H), 3.01–2.90 (m, 4H) superimposed to 2.95 (s, 12H), 2.22–2.04 (m, 4H);  $^{13}\text{C}$  NMR (125 MHz,  $\text{CDCl}_3$ )  $\delta$  151.6, 140.4, 126.4, 110.0, 41.3, 41.1; HRMS  $[\text{M} + \text{H}]^+$ : 295.2169,  $\text{C}_{20}\text{H}_{27}\text{N}_2$  requires 295.2174.

**5-Methoxy[2.2]metacyclophane (8e)** [10]. A solution of 1-methoxy-3-methyl-5-(3-methylphenethyl)benzene (**6e**) (79 mg, 0.33 mmol) in THF (15 mL) at  $-78^\circ\text{C}$  was treated dropwise with BuLi (2.50 M, 0.29 mL, 0.73 mmol) and stirred for 5 min. KO $t$ -Bu (1.0 M in THF, 0.73 mL, 0.73 mmol) was added dropwise followed by 2,2,6,6-tetramethylpiperidine (0.11 mL, 0.66 mmol).

The reaction mixture was stirred for 30 min during which time the temperature was raised to  $-60$  °C. Afterwards 1,2-dibromoethane (85  $\mu$ L, 0.99 mmol) was added, the reaction mixture was warmed to rt and the solvent was removed under reduced pressure. Diethyl ether (30 mL) was added to the residue, washed with HCl (2 M, 3 x 10 mL), dried over sodium sulphate and concentrated to dryness. Purification by silica gel chromatography eluting with 99:1 cyclohexane:diethyl ether gave **8e** as a white solid ( $R_f$  = 0.55, 33 mg, 42%).  $^1\text{H}$  NMR (500 MHz,  $\text{CDCl}_3$ )  $\delta$  7.25 (t,  $J$  = 7.4 Hz, 1H), 7.03 (dd,  $J$  = 7.4, 1.4 Hz, 2H), 6.64 (d,  $J$  = 0.9 Hz, 2H), 4.38 (s, 1H), 3.98 (s, 1H), 3.84 (s, 3H), 3.05 (m, 4H), 2.12 (m, 4H);  $^{13}\text{C}$  NMR (125 MHz,  $\text{CDCl}_3$ )  $\delta$  160.7, 140.4, 138.9, 136.2, 129.9, 128.5, 125.3, 110.8, 55.3, 41.1, 40.9; HRMS  $[\text{M}]^+$ : 238.1359,  $\text{C}_{17}\text{H}_{18}\text{O}$  requires 238.1358.

**[2.2]Metacyclophane-4-carboxylic acid (8f)** [11]. A solution of 4-methyl-2-(3-methylphenethyl)benzoic acid (**6f**) (31 mg, 0.12 mmol) in THF (10 mL) at  $-78$  °C was treated dropwise with BuLi (2.50 M, 0.15 mL, 0.37 mmol) and stirred for 5 min. KO $t$ -Bu (1.0 M in THF, 0.37 mL, 0.37 mmol) was added dropwise followed by 2,2,6,6-tetramethylpiperidine (42  $\mu$ L, 0.25 mmol). The reaction mixture was stirred for 30 min during which time the temperature was raised to  $-60$  °C. Afterwards 1,2-dibromoethane (32  $\mu$ L, 0.37 mmol) was added, the reaction mixture was warmed to rt and the solvent was removed under reduced pressure. Diethyl ether (30 mL) was added to the residue, washed with HCl (2 M, 3 x 10 mL), dried over sodium sulphate and concentrated to dryness. Purification by silica gel chromatography eluting with 1:1 cyclohexane:diethyl ether gave **8f** as a white solid ( $R_f$  = 0.55, 12 mg, 39%).  $^1\text{H}$  NMR (500 MHz,  $\text{CD}_3\text{OD}$ )  $\delta$  7.83 (d,  $J$  = 7.9 Hz, 1H), 7.21 (t,  $J$  = 7.5 Hz, 1H), 7.06 (dd,  $J$  = 7.9, 1.4 Hz, 1H), 7.06–6.92 (m, 2H), 4.21 (s, 1H), 4.18 (s, 1H), 4.15 (dt,  $J$  = 11.9, 3.6 Hz, 1H), 3.09–3.04 (m, 2H), 3.01 (dt,  $J$  = 12.2, 3.6 Hz, 1H), 2.10 (td,  $J$  = 12.2, 3.1 Hz, 1H), 2.04–1.93 (m, 2H), 1.70 (td,  $J$  = 11.9, 3.1 Hz, 1H);  $^{13}\text{C}$  NMR (125 MHz,  $\text{CDCl}_3$ )  $\delta$  172.8, 144.5, 141.5, 139.3, 138.7, 138.1, 135.8, 132.2, 129.3, 125.8, 125.6, 125.3, 41.0, 40.7, 40.3, 39.2; HRMS  $[\text{M}-\text{H}]^+$ : 251.1078,  $\text{C}_{17}\text{H}_{15}\text{O}_2$  requires 251.1072.



## References

1. Kofron, W. G.; Baclawski, L. M. *J. Org. Chem.* **1976**, *41*, 1879–1880.
2. Smith, K; Hou, D. *J. Chem. Soc. Perkin Trans. 1* **1995**, 185–186.
3. Effenberger, F.; Kottmann, H. *Tetrahedron* **1985**, *41*, 4171–4182.
4. Burbiel, J. C. *ARKIVOC* **2006**, *13*, 16–21.
5. Wilson, D. J.; Boekelheide, V. R.; Grifinn, Jr., W. *J. Am. Chem. Soc.* **1960**, *82*, 6302–6304.
6. Shizuka, H.; Sorimachi, K; Morita, T.; Nishiyama, K.; Sato, T. *Bull. Chem. Soc. Jpn.* **1971**, *44*, 1983–1984.
7. Bodwell, G.J.; Houghton, T.J; Kennedy, J.; Mannion, M. R. *Angew. Chem., Int. Ed.* **1996**, *35*, 2121–2123.
8. Crystal structure data has been deposited at the Cambridge Crystallographic Data Centre with deposit number CCDC 825095.
9. Ueda, N.; Natsume, B.; Yanagiuchi, K.; Sakata, Y.; Enoki, T.; Saito, G.; Inokuchi, H.; Misumi, S. *Bull. Chem. Soc. Jpn.* **1983**, *56*, 775–779.
10. Sherrod, S. A.; Da Costa, R. L. *Tetrahedron Lett.* **1973**, *23*, 2083–2086.
11. Kainradl, B.; Langer, E.; Lehner, H.; Schlögl, K. *Liebigs Ann. Chem.* **1972**, *766*, 16–31.

**1,2-Di-*meta*-tolylethane (6a).**

$^1\text{H}$  NMR

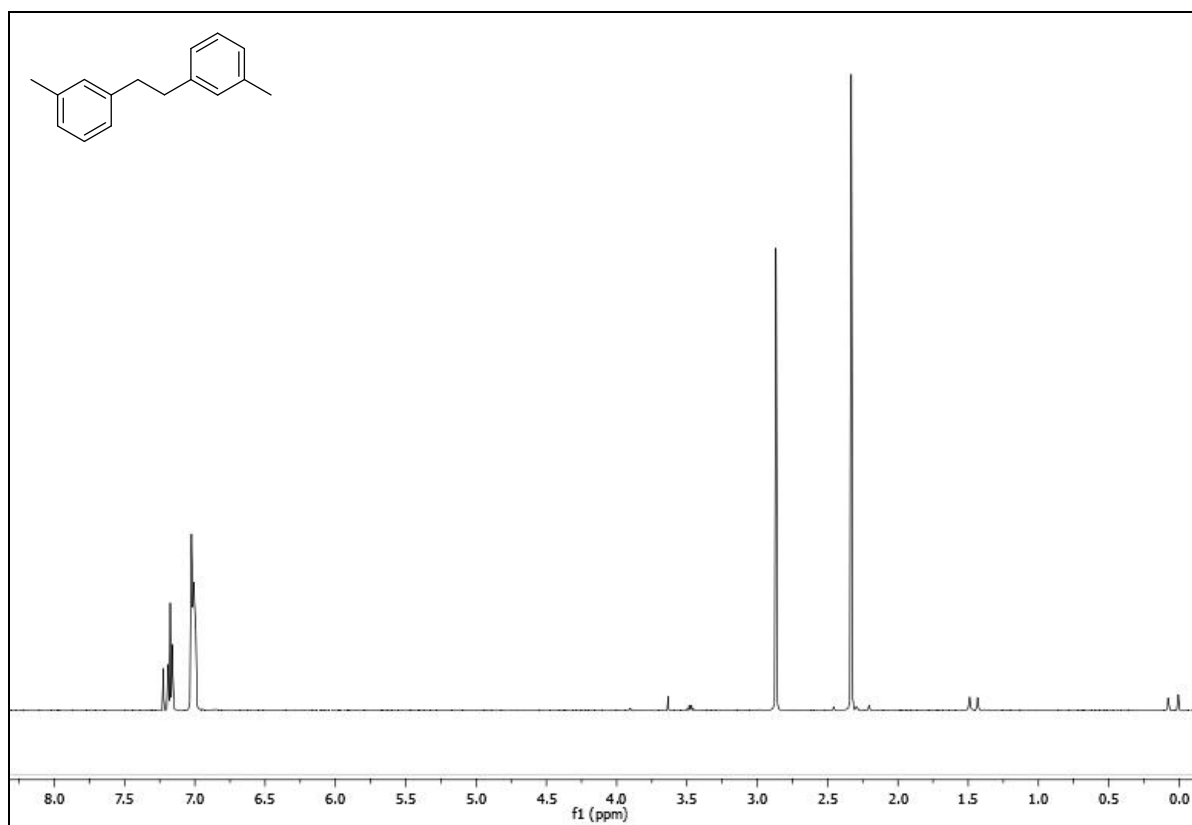

$^{13}\text{C}$  NMR

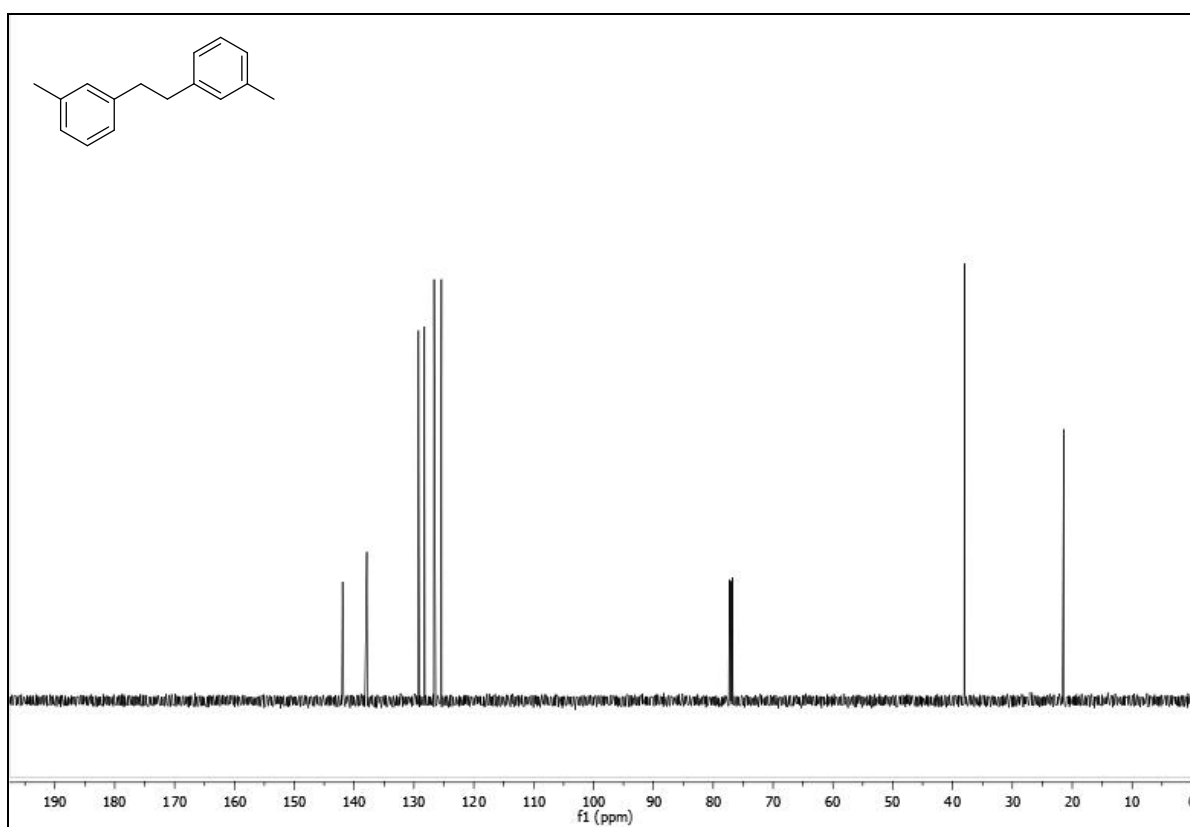

**1,2-Bis(3,5-dimethylphenyl)ethane (6b).**

$^1\text{H}$  NMR

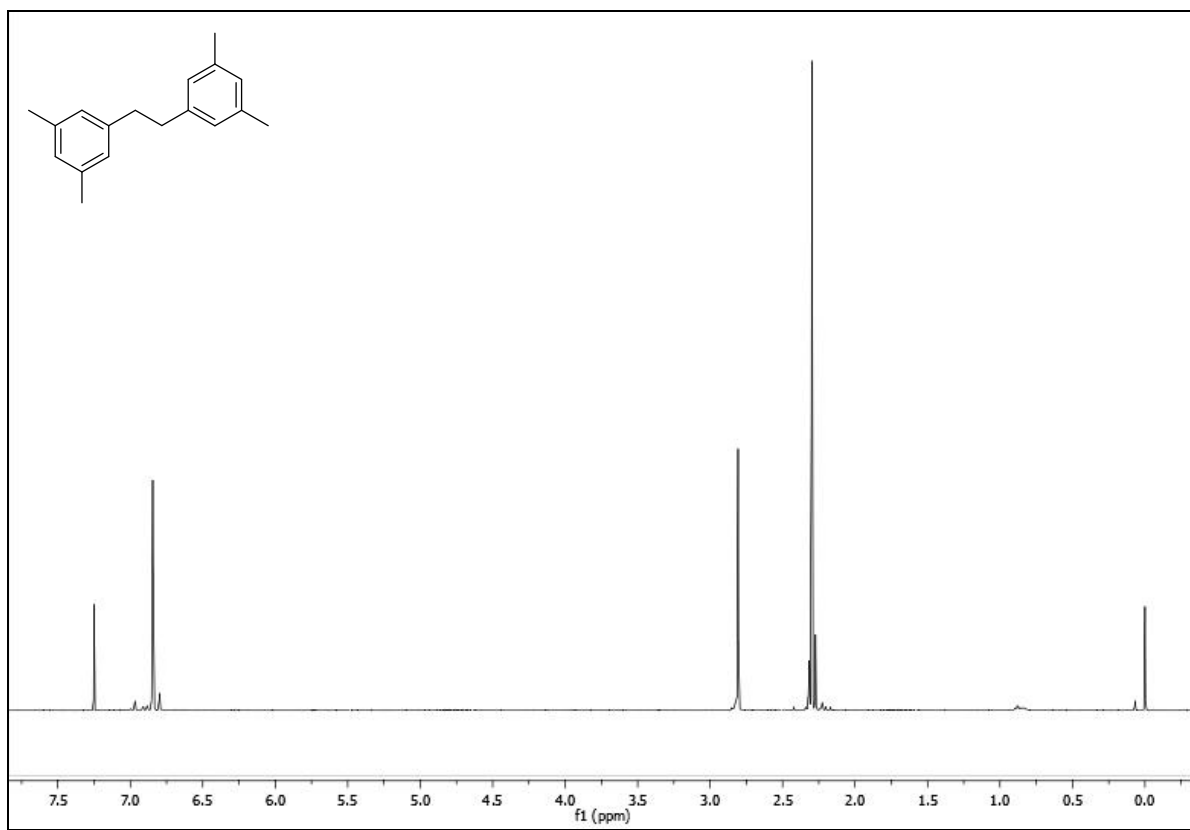

$^{13}\text{C}$  NMR

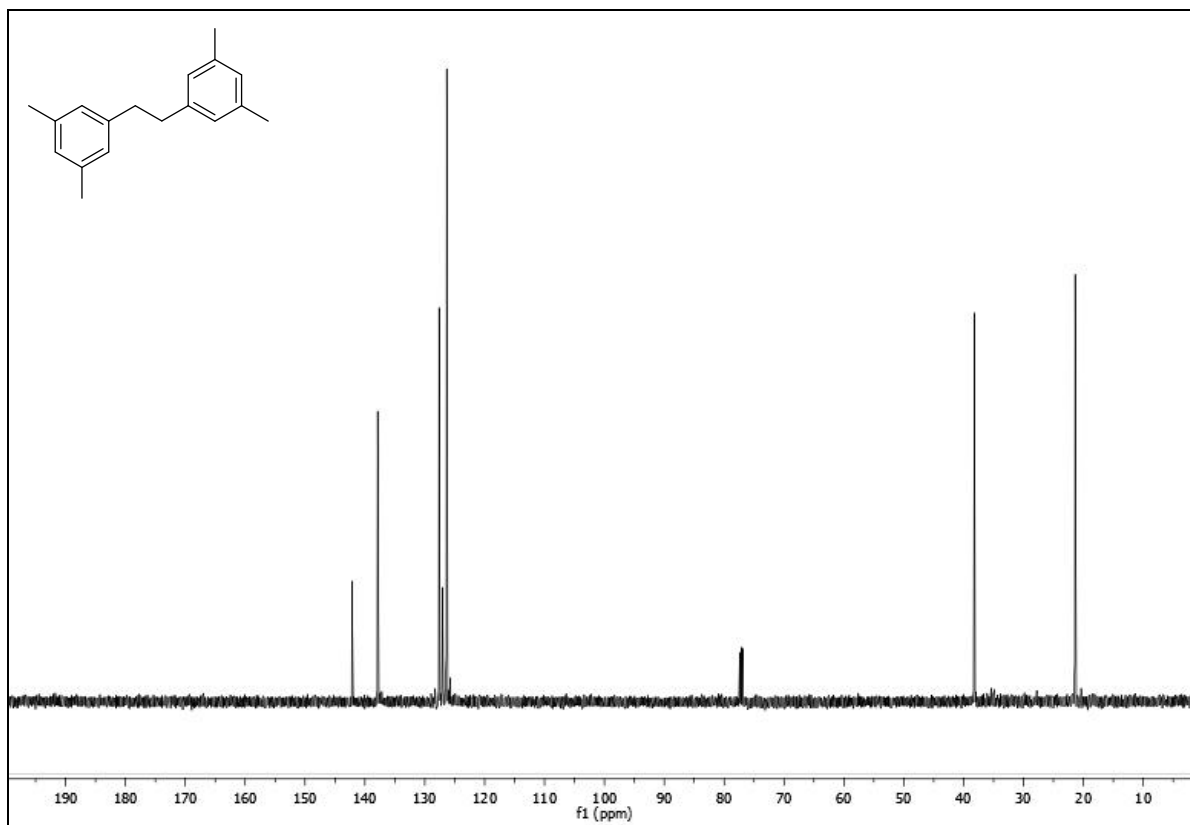

**1,2-Bis(3-methoxy-5-methylphenyl)ethane (6c).**

<sup>1</sup>H NMR

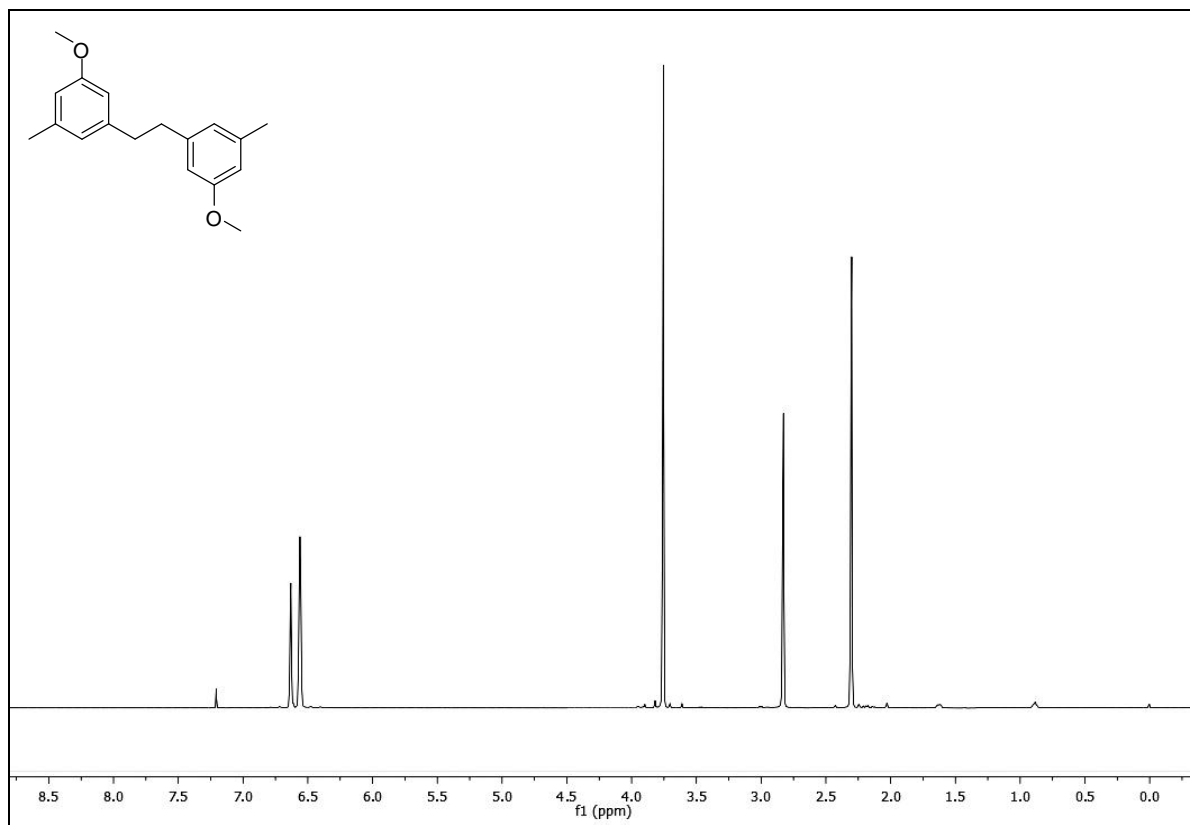

<sup>13</sup>C NMR

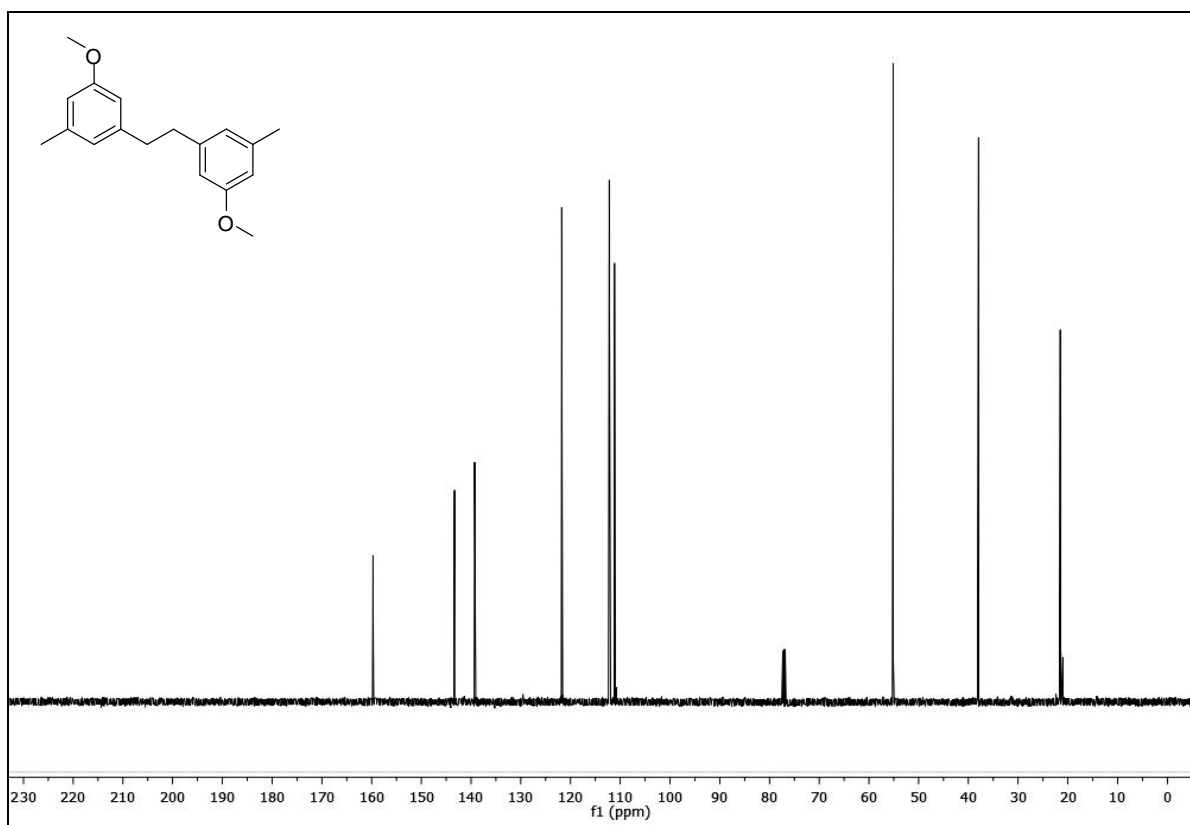

**5,5'-(Ethane-1,2-diyl)bis(*N,N*,3-trimethylaniline) (6d).**

<sup>1</sup>H NMR

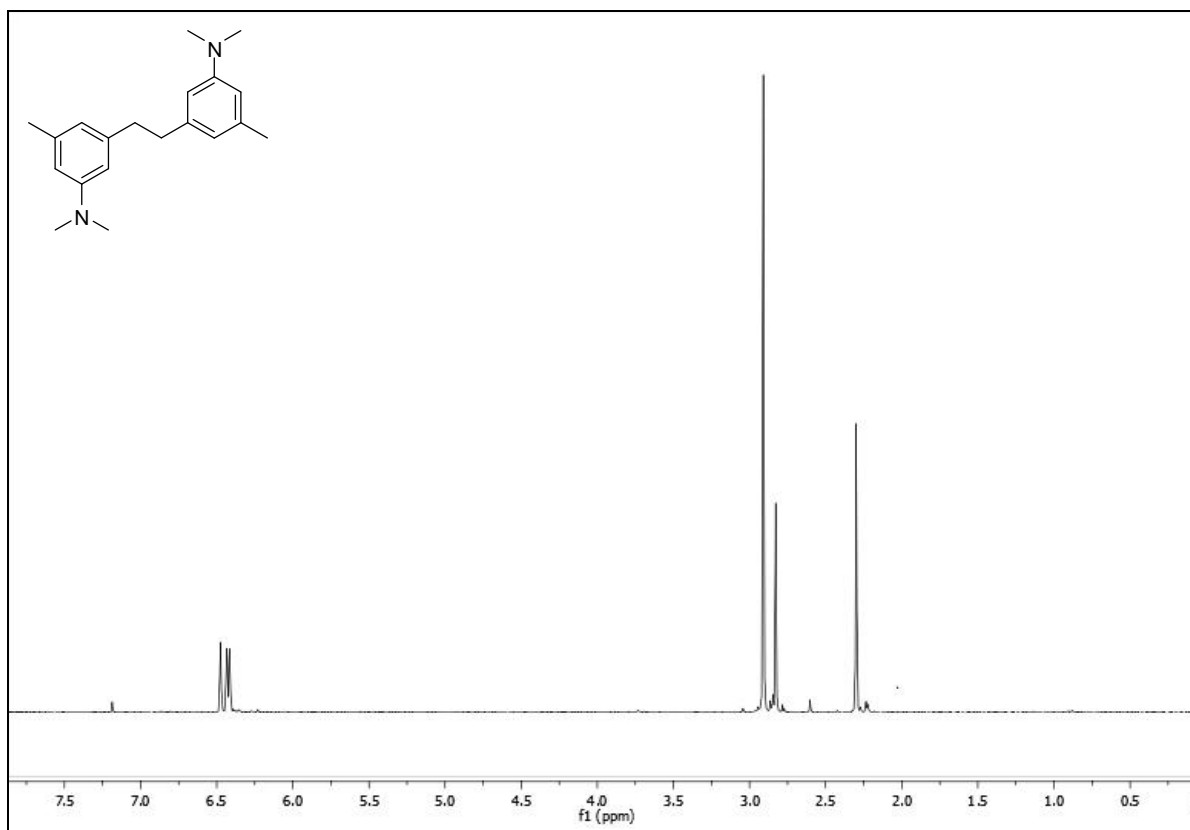

<sup>13</sup>C NMR

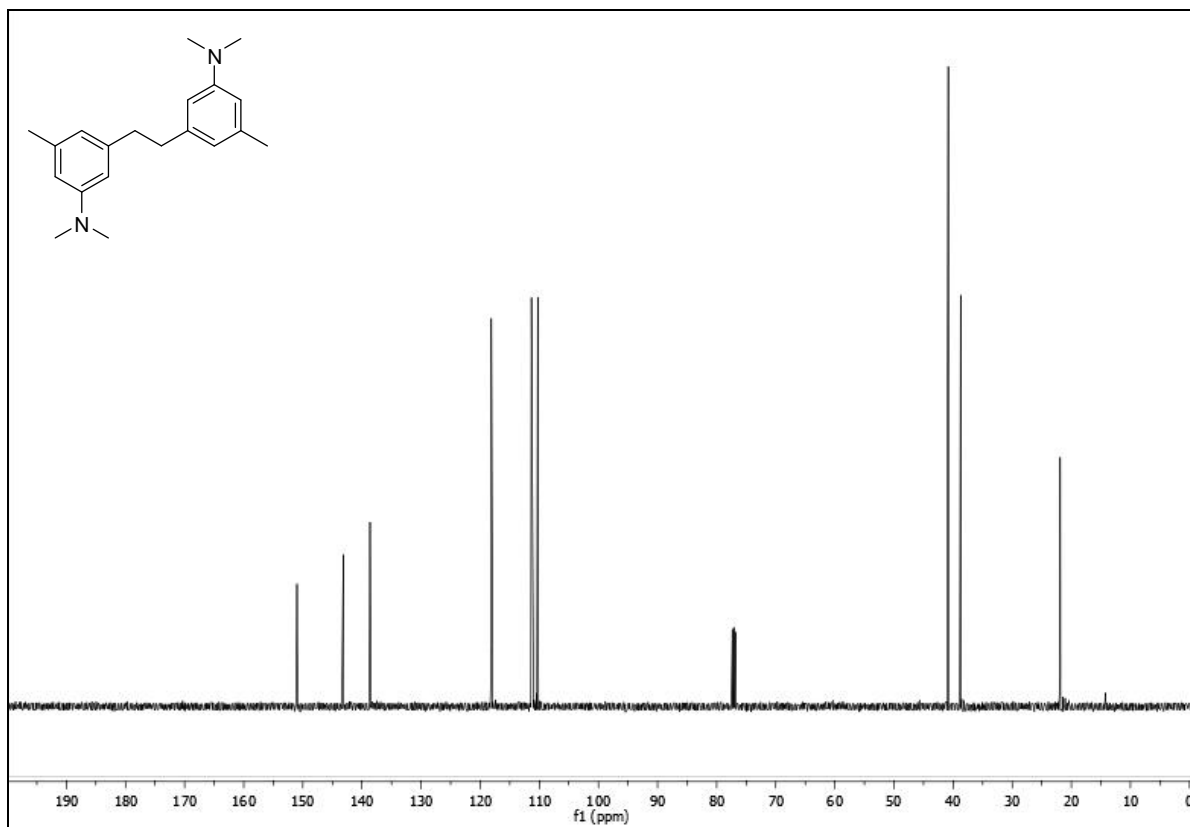

**1-Methoxy-3-methyl-5-(3-methylphenethyl)benzene (6e).**

$^1\text{H}$  NMR

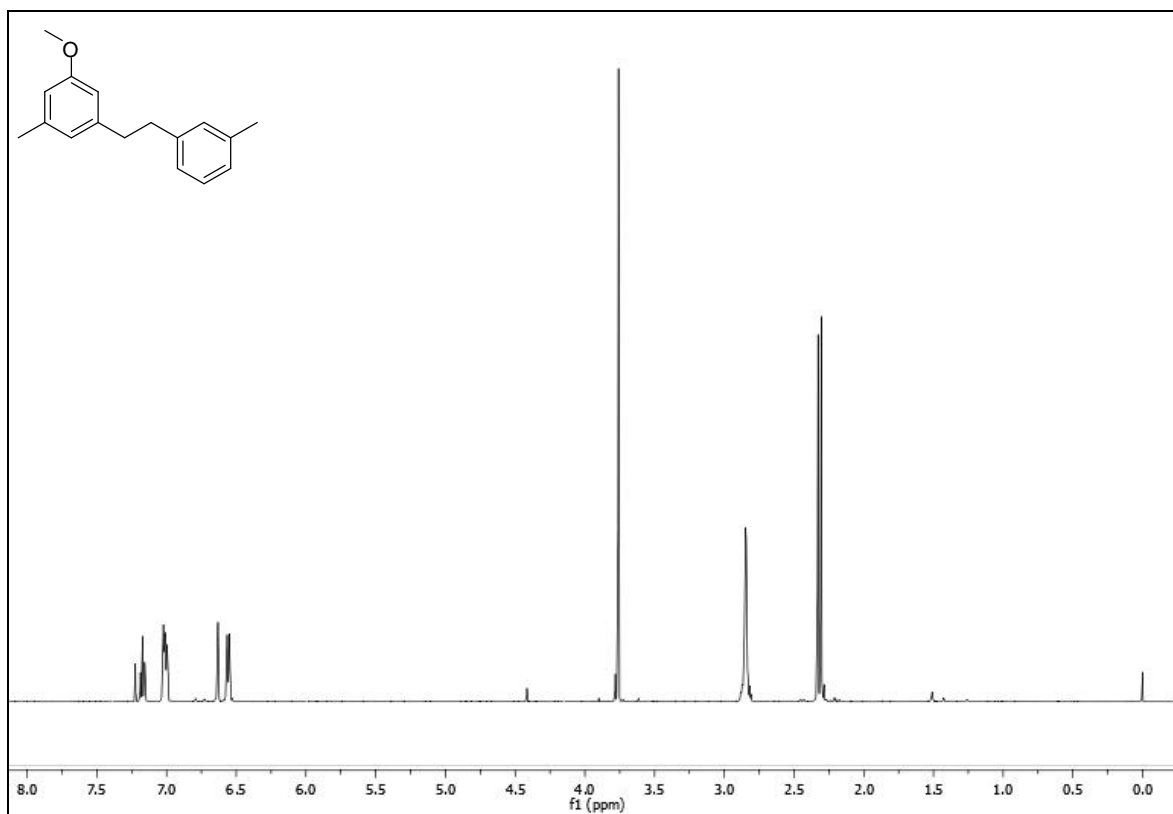

$^{13}\text{C}$  NMR

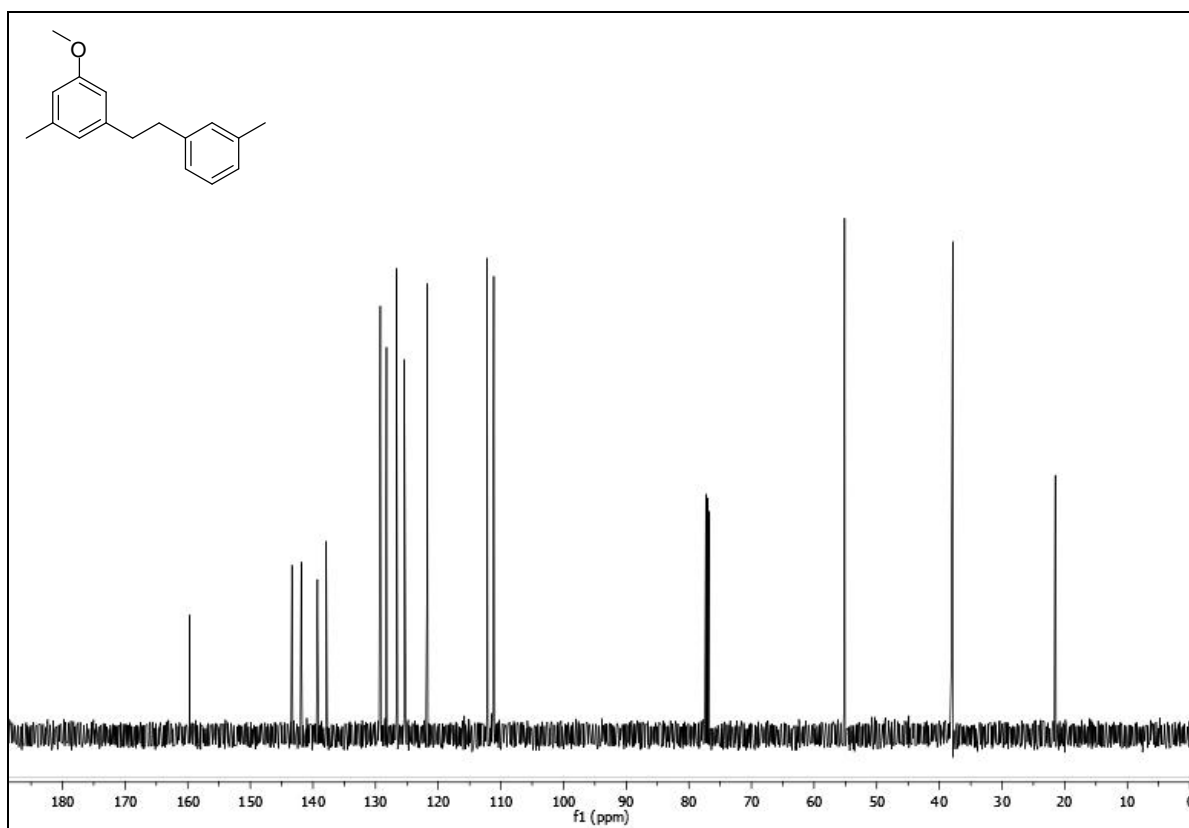

**4-Methyl-2-(3-methylphenethyl)benzoic acid (6f).**

$^1\text{H}$  NMR

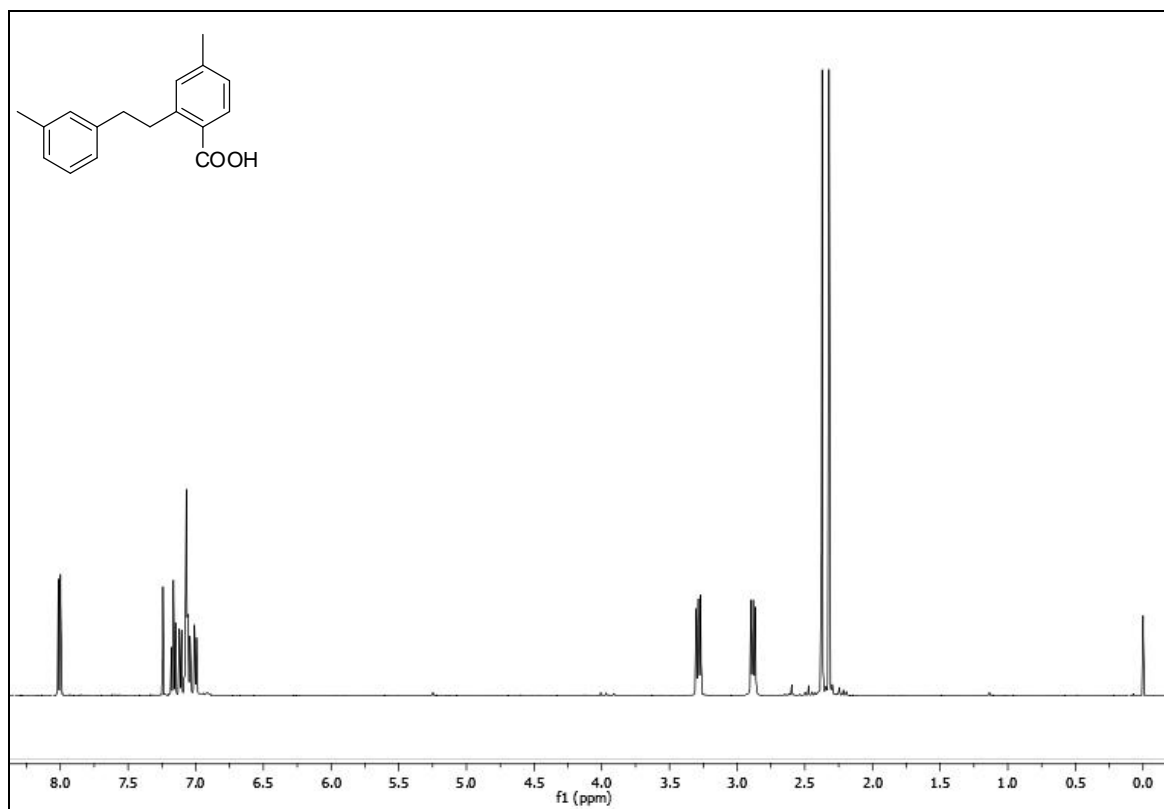

$^{13}\text{C}$  NMR

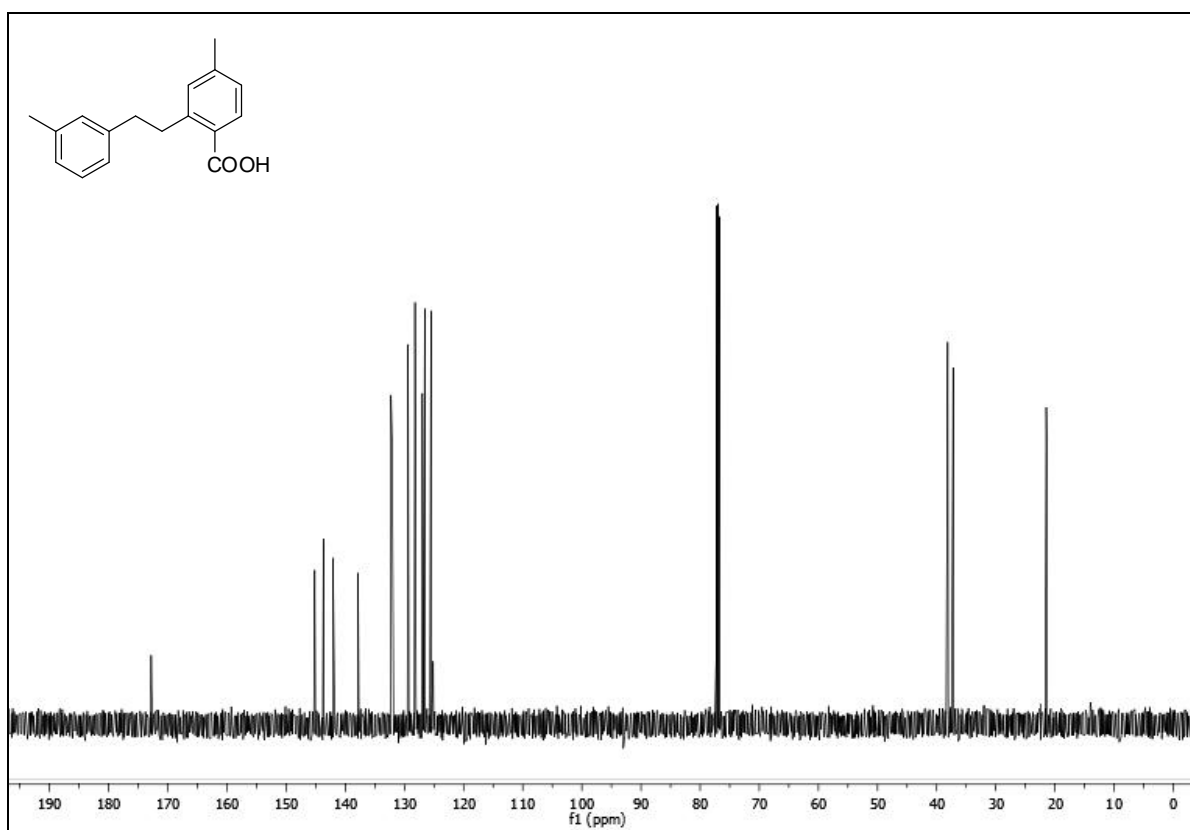

[2.2]Metacyclophane (8a).

$^1\text{H}$  NMR

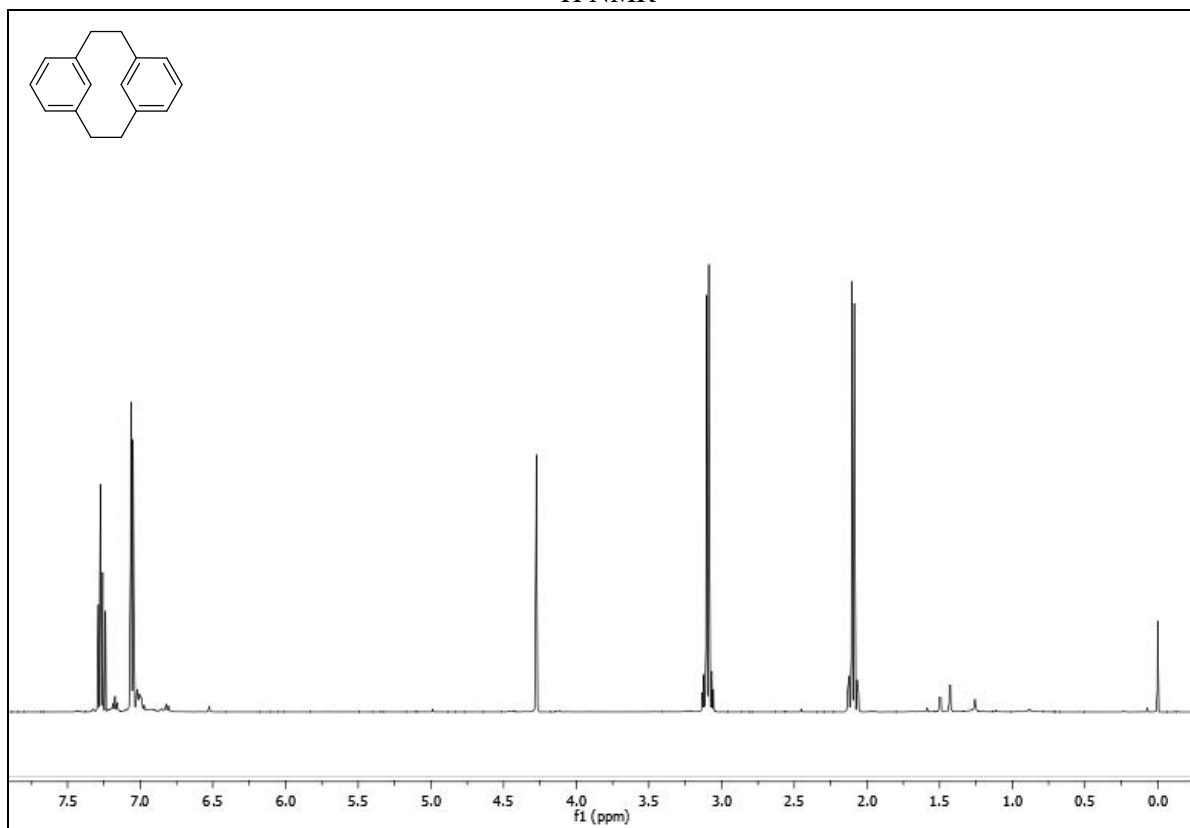

$^{13}\text{C}$  NMR

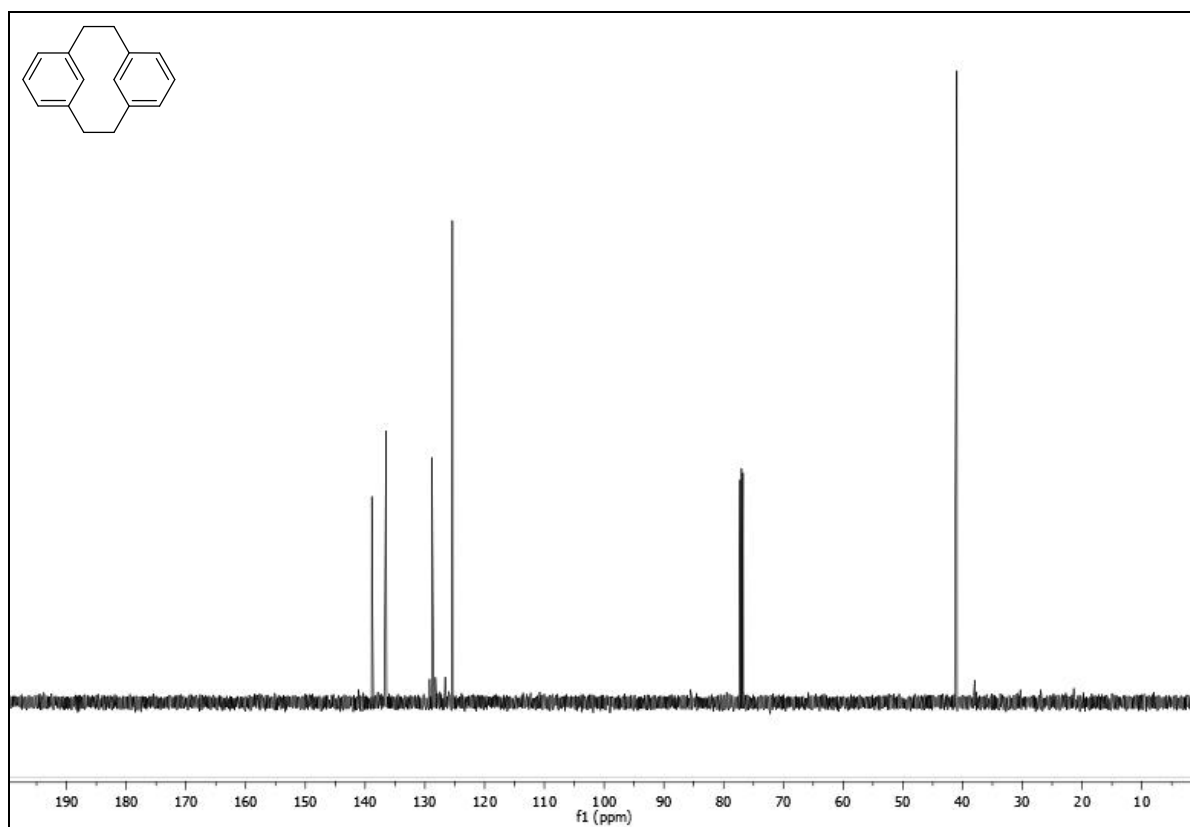



**5,13-Dimethyl[2.2]metacyclophane (8b).**

$^1\text{H}$  NMR

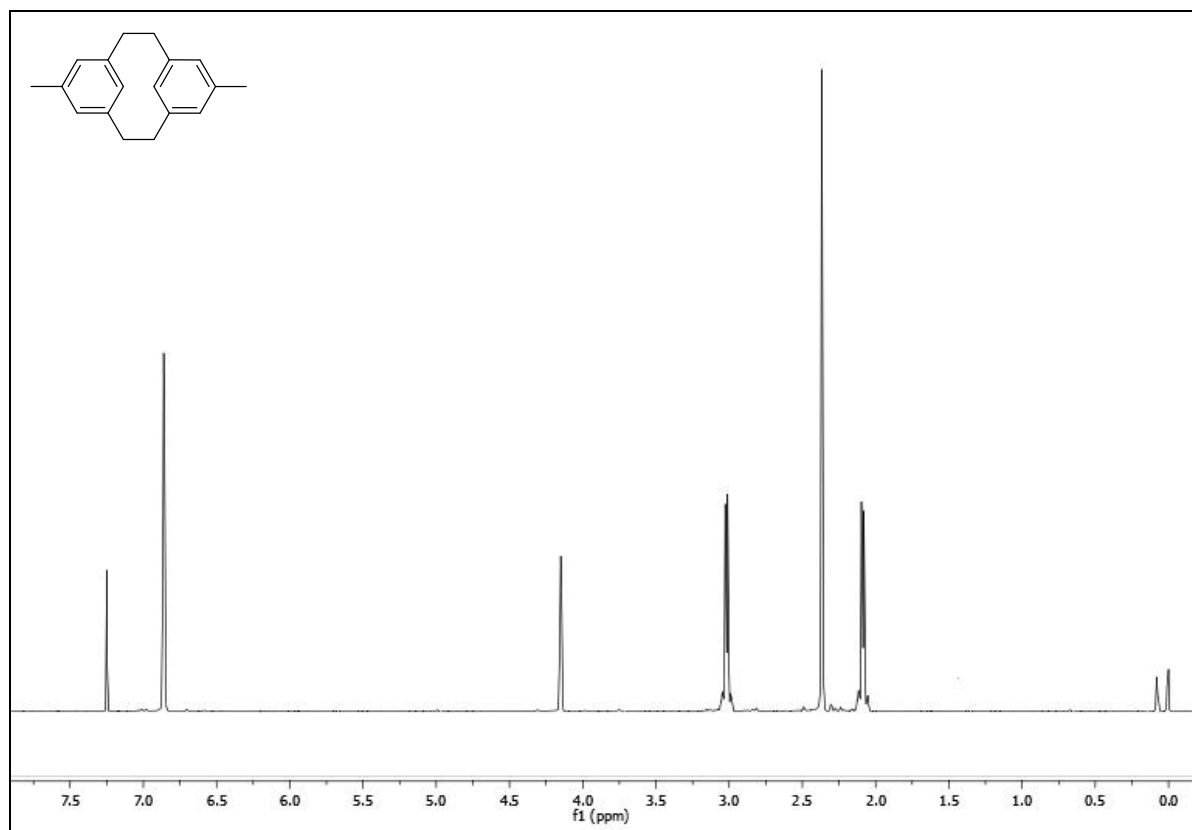

$^{13}\text{C}$  NMR

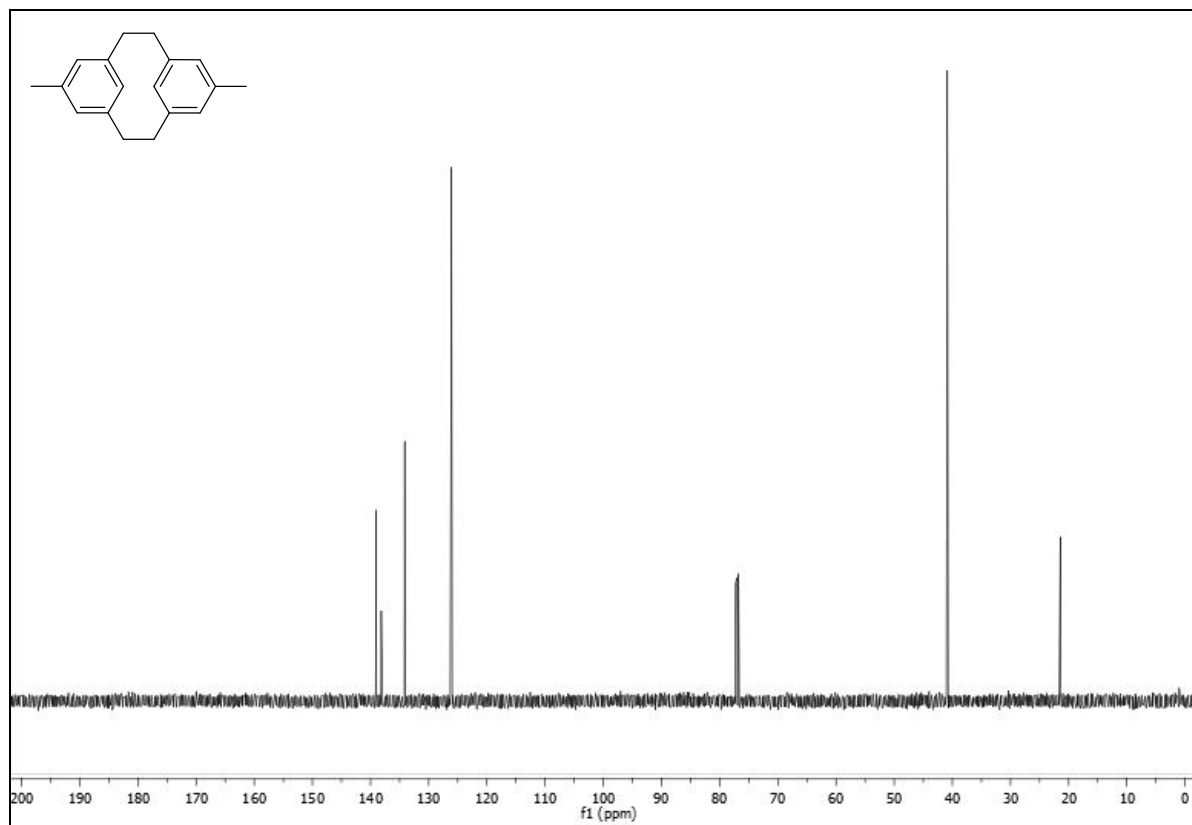

**5,13-Dimethoxy[2.2]metacyclophane (8c).**

$^1\text{H}$  NMR

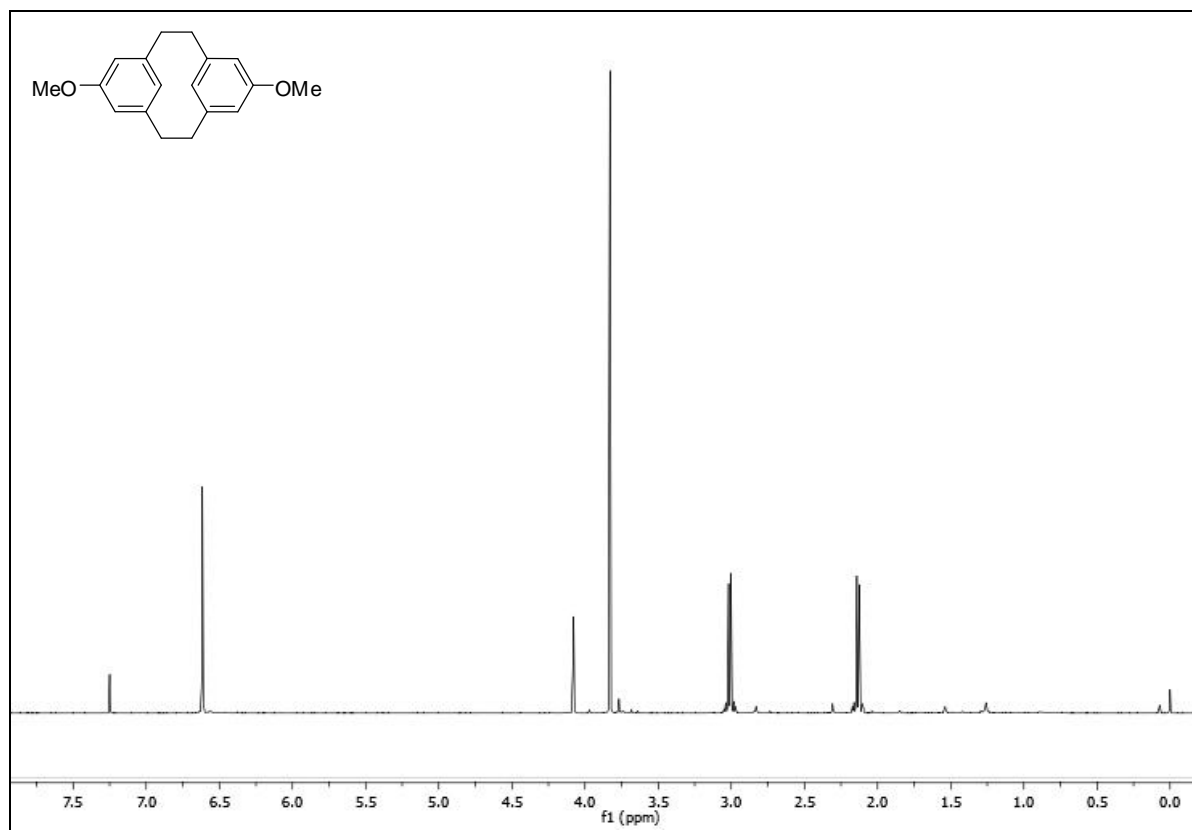

$^{13}\text{C}$  NMR

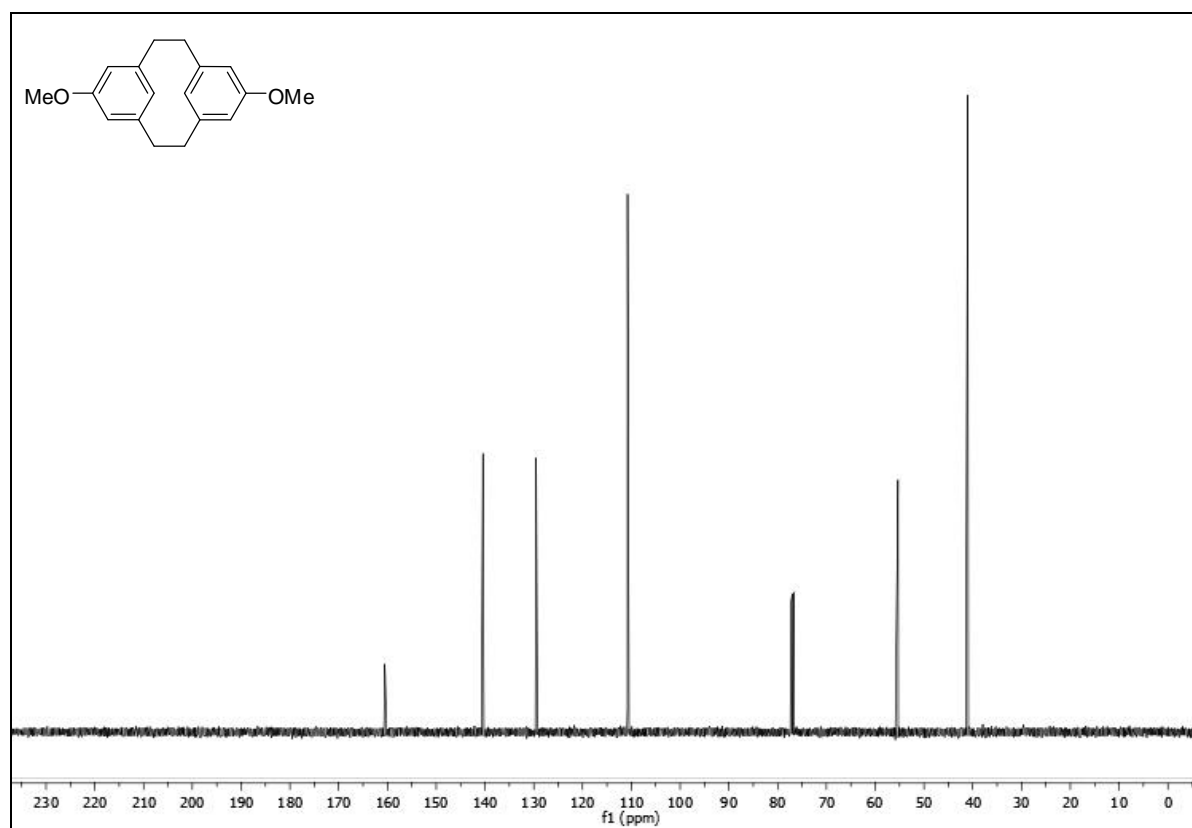

**5,13-Bis(dimethylamino)[2.2]metacyclophane (8d).**

$^1\text{H}$  NMR

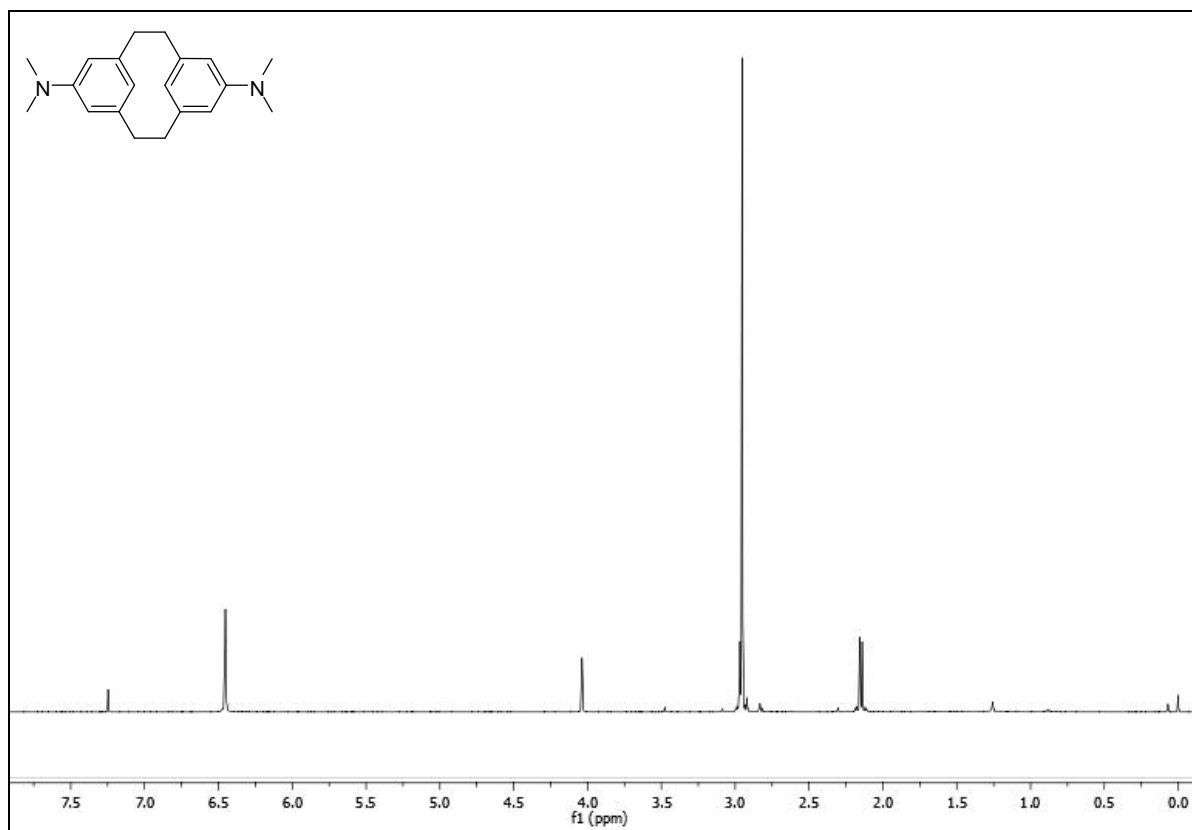

$^{13}\text{C}$  NMR

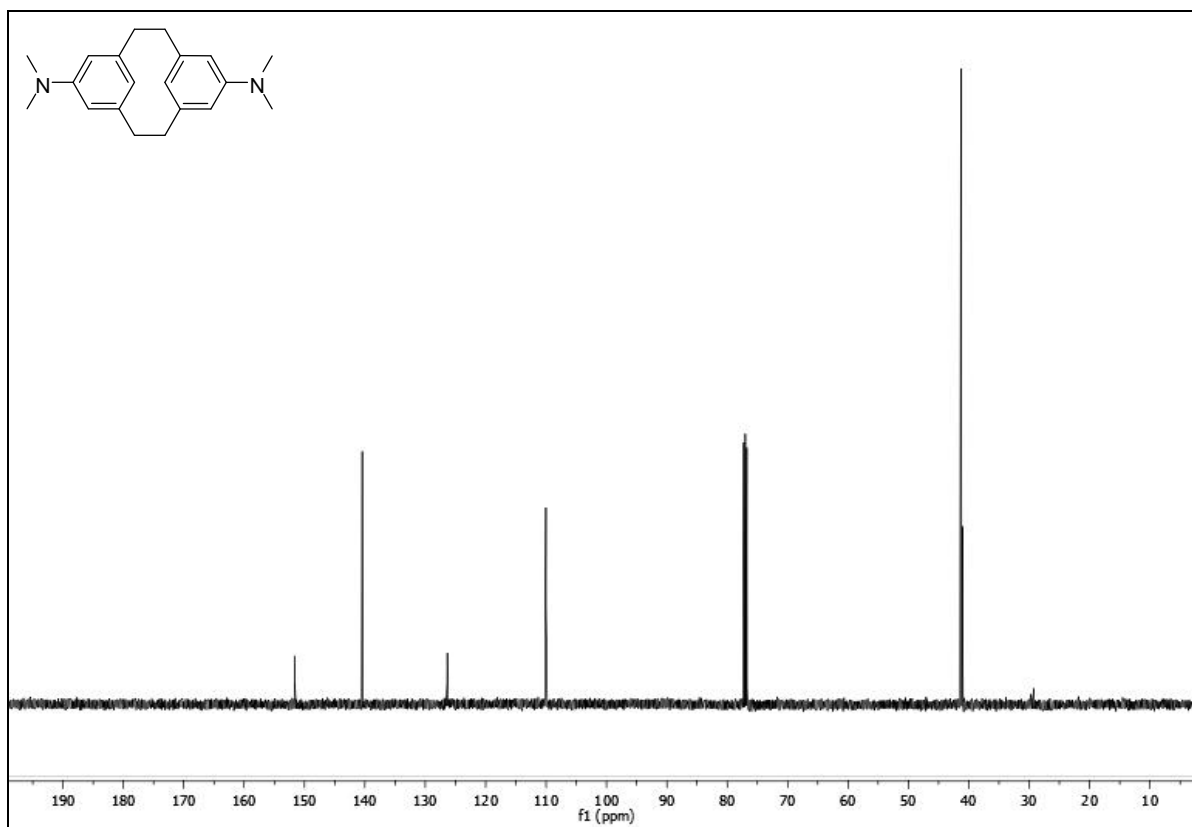

**5-Methoxy[2.2]metacyclophane (8e).**

$^1\text{H}$  NMR

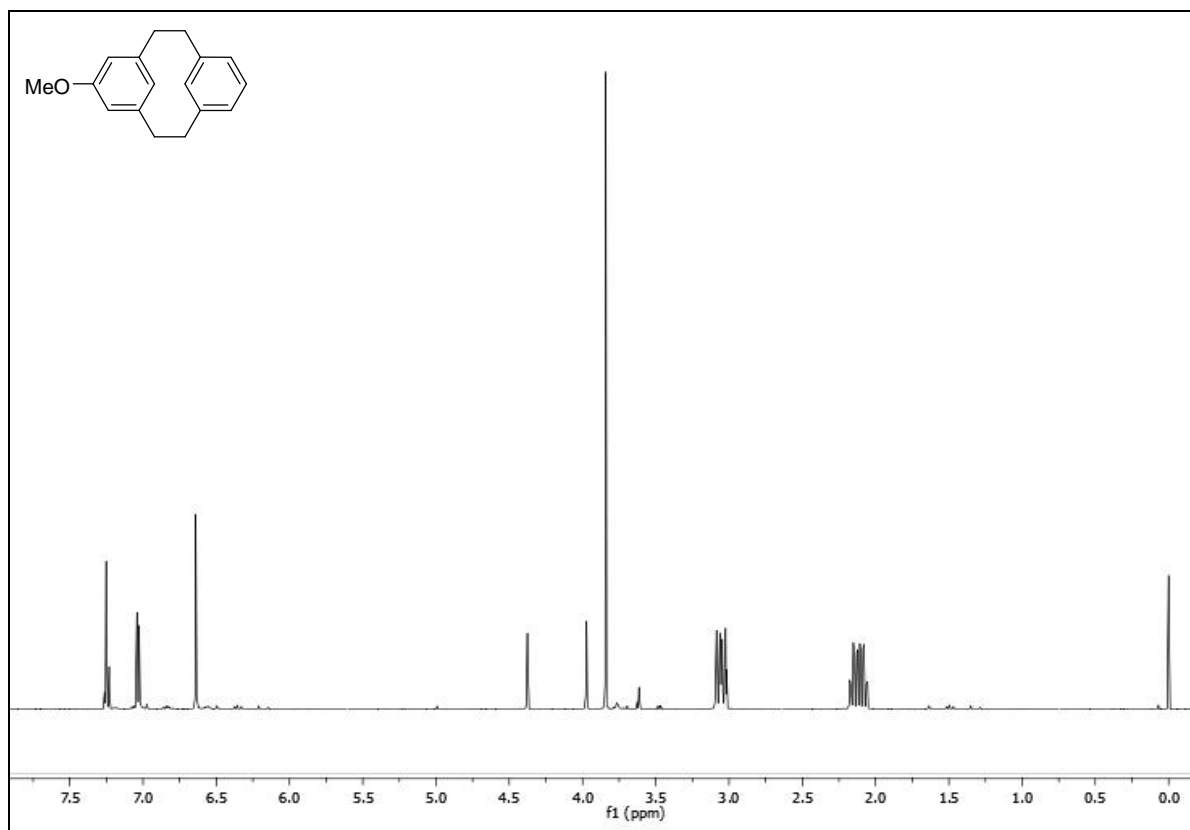

$^{13}\text{C}$  NMR

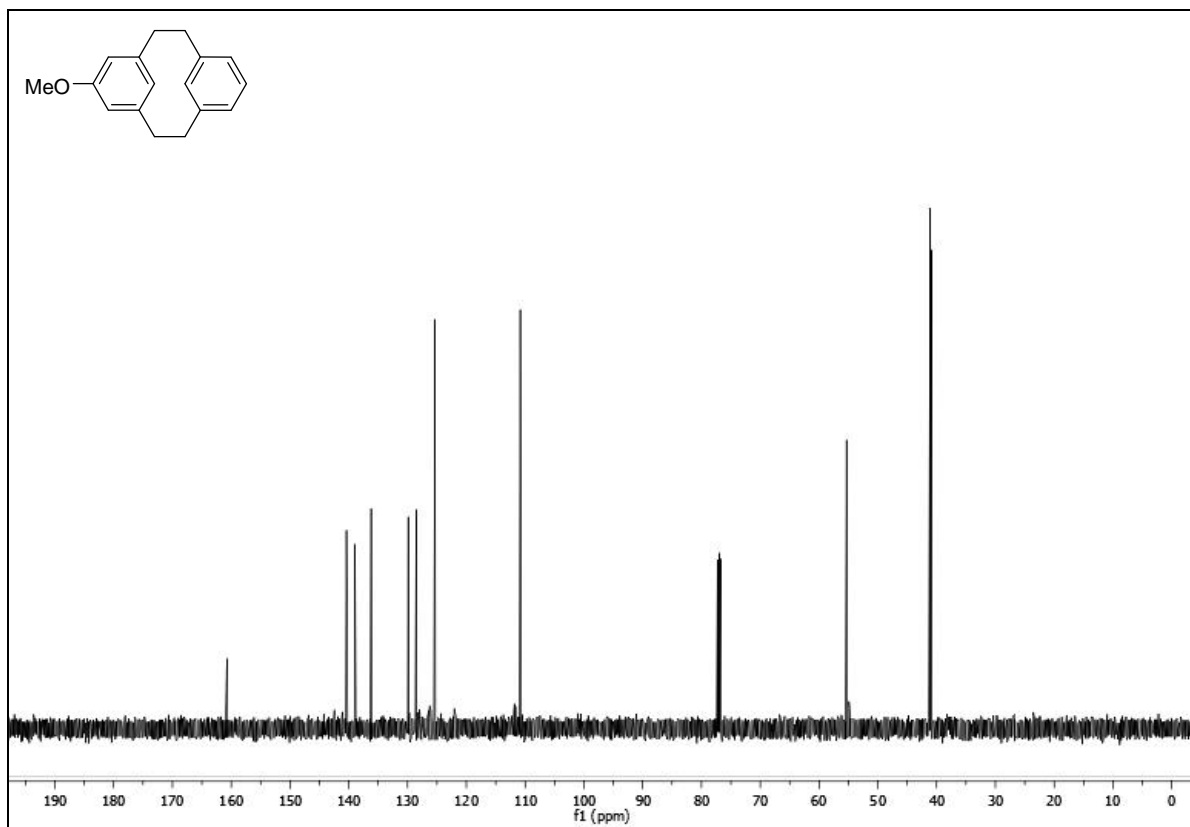

[2.2]metacyclophane-4-carboxylic acid (8f).

$^1\text{H}$  NMR ( $\text{CD}_3\text{OD}$ )

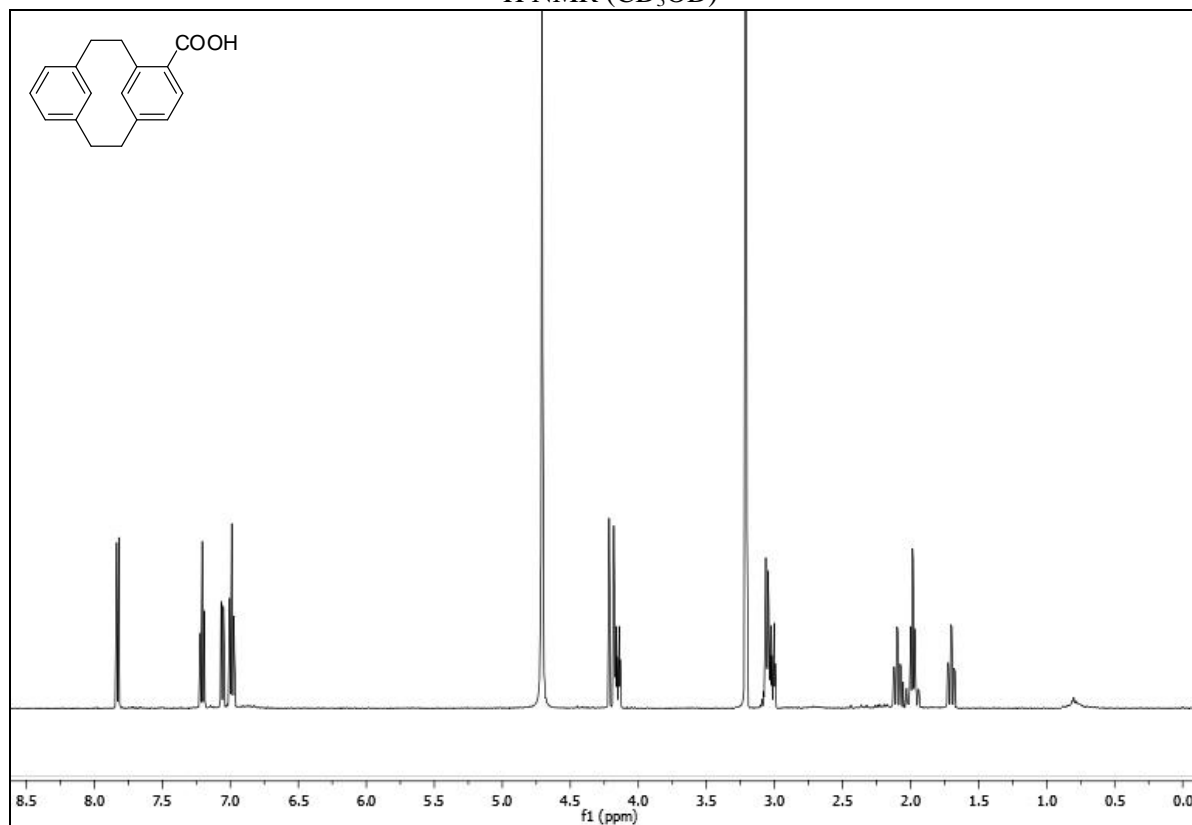

$^{13}\text{C}$  NMR ( $\text{CDCl}_3$ )

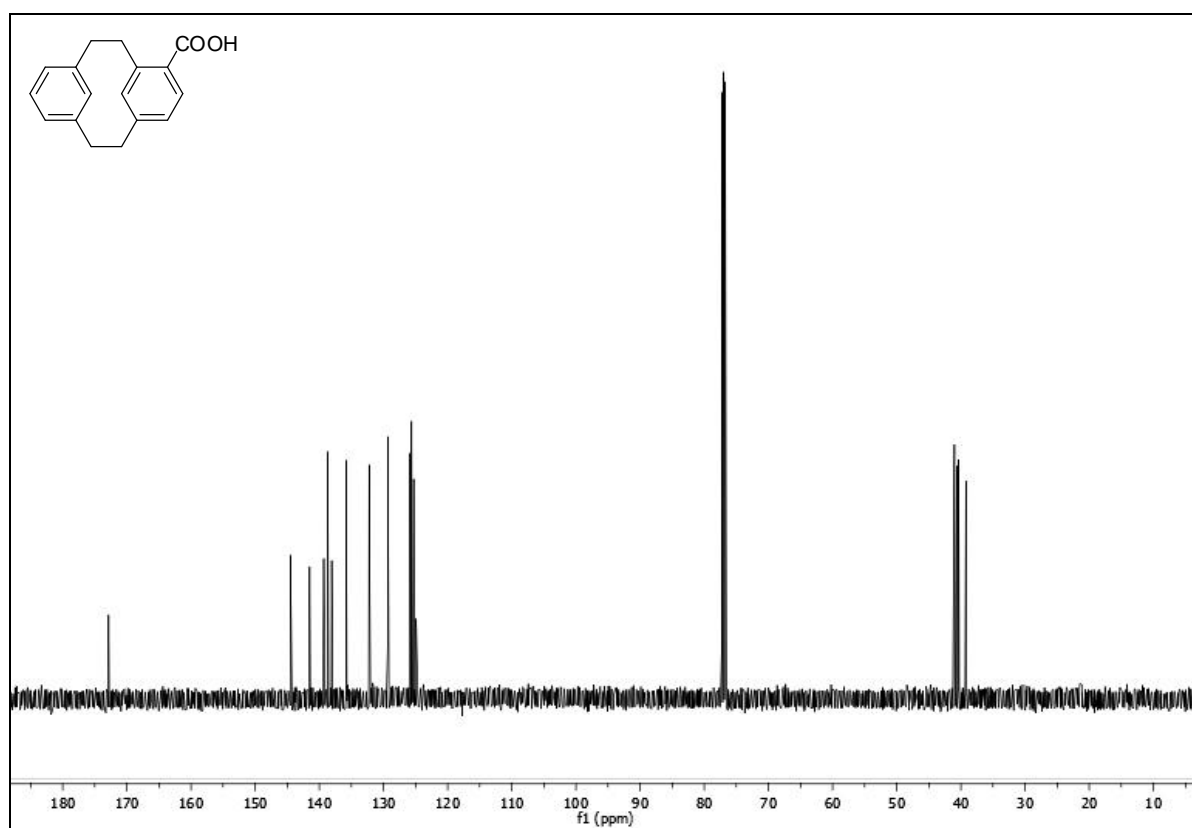

## Synthesis and analysis of compounds D<sub>1</sub>-4e and D<sub>2</sub>-6f

**2-(Deuteriomethyl)-4-methylbenzoic acid (D<sub>1</sub>-4e).** A solution of 2,4-dimethylbenzoic acid (**4e**) (75 mg, 0.50 mmol) in THF (10 mL) at  $-78^{\circ}\text{C}$  was treated dropwise with BuLi (2.50 M, 0.42 mL, 1.05 mmol) and stirred for 5 min. KO<sup>*t*</sup>-Bu (1.0 M in THF, 0.53 mL, 0.53 mmol) was added dropwise followed by 2,2,6,6-tetramethylpiperidine (84  $\mu\text{L}$ , 0.50 mmol). The reaction mixture was stirred for 15 min at  $-78^{\circ}\text{C}$  and CD<sub>3</sub>OD (60  $\mu\text{L}$ ) added. The reaction mixture was warmed to rt and the solvent removed under reduced pressure. Diethyl ether (20 mL) was added to the residue, washed with HCl (2 M, 3 x 10 mL), dried over sodium sulphate and concentrated to dryness to give **D<sub>1</sub>-4e** as a white solid (69 mg, 91%). <sup>1</sup>H NMR (500 MHz, CDCl<sub>3</sub>)  $\delta$  7.99 (d,  $J$  = 8.4 Hz, 1H), 7.09 (s, 2H), 2.63 (s, 2H), 2.38 (s, 3H); <sup>13</sup>C NMR (125 MHz, CDCl<sub>3</sub>)  $\delta$  173.2, 143.6, 141.5, 132.7, 131.8, 126.6, 125.5, 22.1 (t,  $J$  = 20.0 Hz), 21.4; <sup>2</sup>H NMR (92.07 MHz, CH<sub>2</sub>Cl<sub>2</sub>)  $\delta$  2.63 (t,  $J$  = 2.1 Hz); HRMS [M – H]<sup>+</sup>: 150.0658, C<sub>9</sub>H<sub>8</sub>DO<sub>2</sub> requires 150.0665.

**4-(Deuteriomethyl)-2-(3-(deuteriomethyl)phenethyl)benzoic acid (D<sub>2</sub>-6f).** A solution of 4-methyl-2-(3-methylphenethyl)benzoic acid (**6f**) (50 mg, 0.20 mmol) in THF (7 mL) at  $-78^{\circ}\text{C}$  was treated dropwise with BuLi (2.50 M, 0.24 mL, 0.60 mmol) and stirred for 5 min. KO<sup>*t*</sup>-Bu (1.0 M in THF, 0.40 mL, 0.40 mmol) was added dropwise followed by 2,2,6,6-tetramethylpiperidine (68  $\mu\text{L}$ , 0.40 mmol). The reaction mixture was stirred for 15 min at  $-78^{\circ}\text{C}$  and CD<sub>3</sub>OD (60  $\mu\text{L}$ ) added. The reaction mixture was warmed to rt and the solvent removed under reduced pressure. Diethyl ether (20 mL) was added to the residue, washed with HCl (2 M, 3 x 10 mL), dried over sodium sulphate and concentrated to dryness to give **D<sub>2</sub>-6f** as a pale yellow solid (45 mg, 87%). <sup>1</sup>H NMR (500 MHz, CDCl<sub>3</sub>)  $\delta$  8.00 (d,  $J$  = 8.0 Hz, 1H), 7.17 (t,  $J$  = 7.5 Hz, 1H), 7.11 (d,  $J$  = 8.0 Hz, 1H), 7.09–7.03 (m, 3H), 7.00 (d,  $J$  = 7.5 Hz, 1H), 3.32–3.25 (m, 2H), 2.92–2.82 (m, 2H), 2.43–2.24 (m, 4H); <sup>13</sup>C NMR (125 MHz, CDCl<sub>3</sub>)  $\delta$  172.8, 145.2, 143.7, 142.1, 137.8, 132.3, 132.0, 129.4, 128.2, 127.0, 126.6, 125.5, 38.1, 37.2, 21.3 (t,  $J$  = 19.3 Hz), 21.2 (t,  $J$  = 19.8 Hz); <sup>2</sup>H NMR (92.07 MHz, CH<sub>2</sub>Cl<sub>2</sub>)  $\delta$  2.44–2.18 (m); HRMS [M – H]<sup>+</sup>: 255.1342, C<sub>17</sub>H<sub>15</sub>D<sub>2</sub>O<sub>2</sub> requires 255.1354.

**2-(Deuteriomethyl)-4-methylbenzoic acid (D<sub>1</sub>-4e).**

<sup>1</sup>H NMR

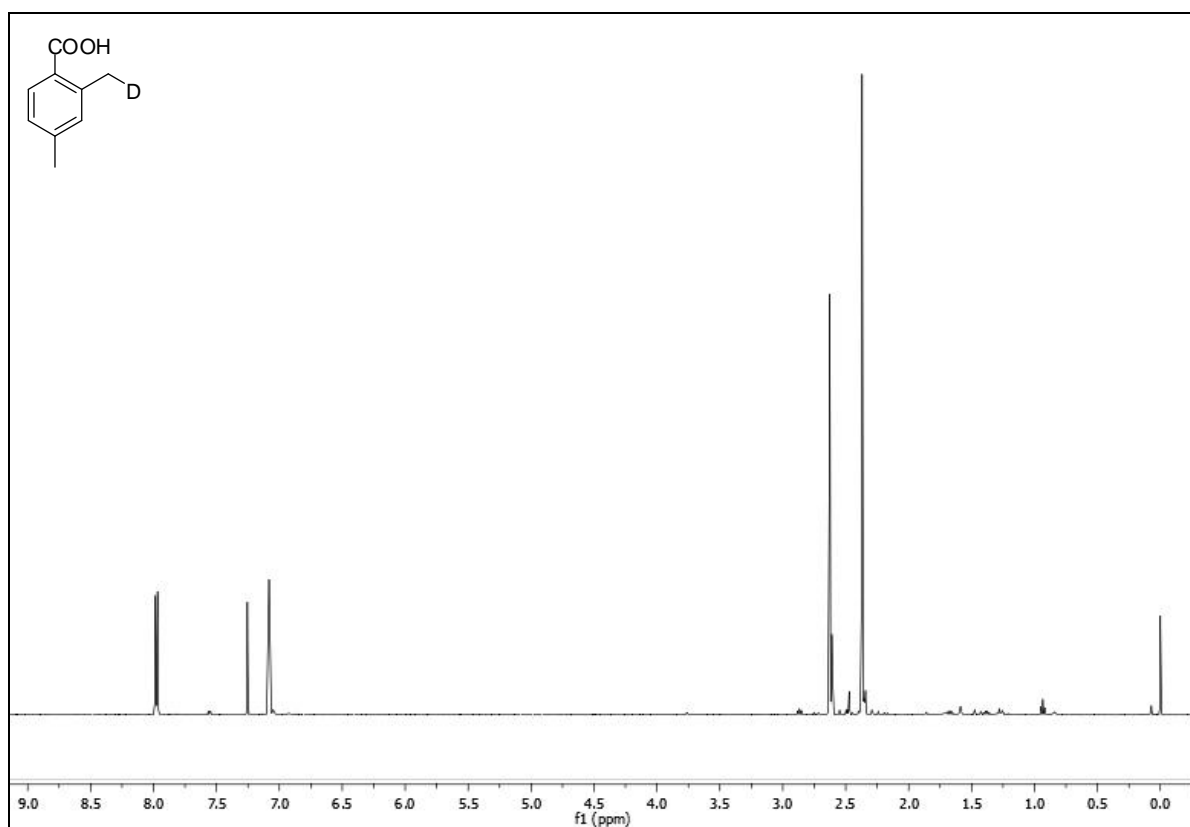

<sup>13</sup>C NMR

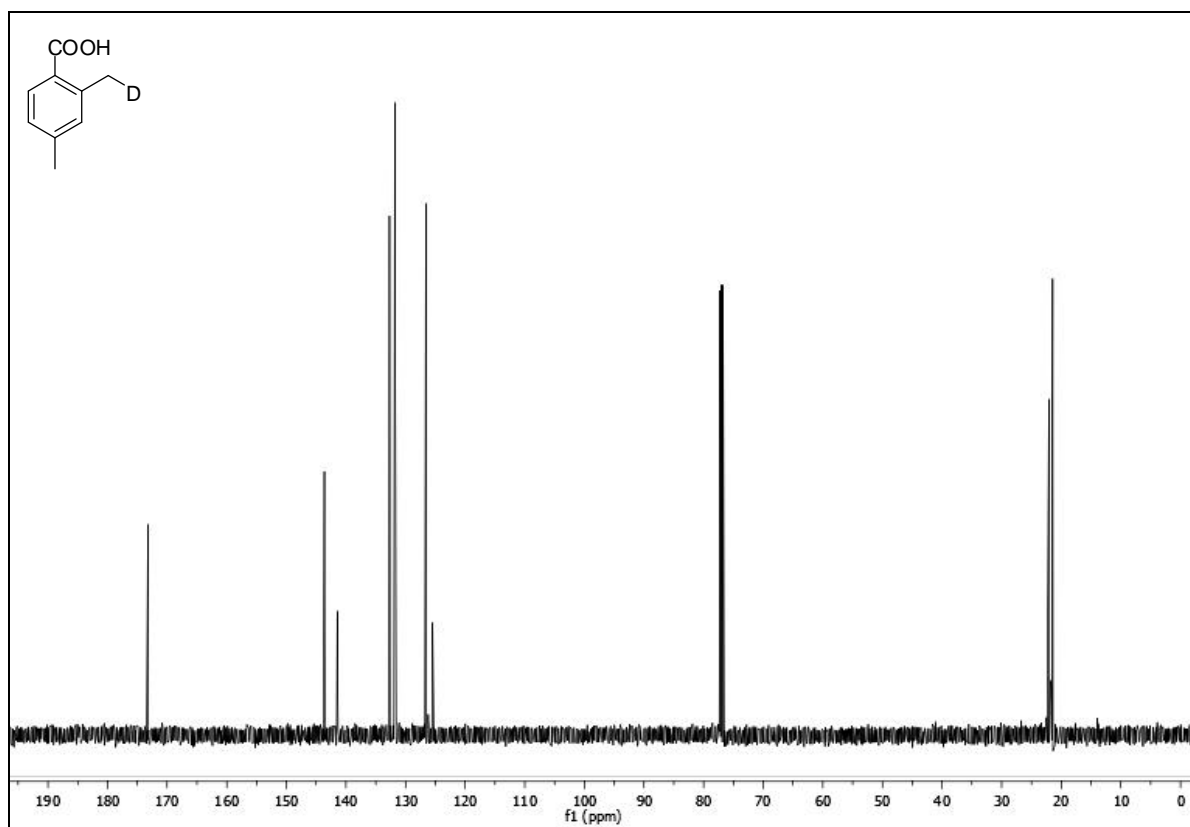

$^2\text{H}$  NMR ( $\text{CH}_2\text{Cl}_2$ )

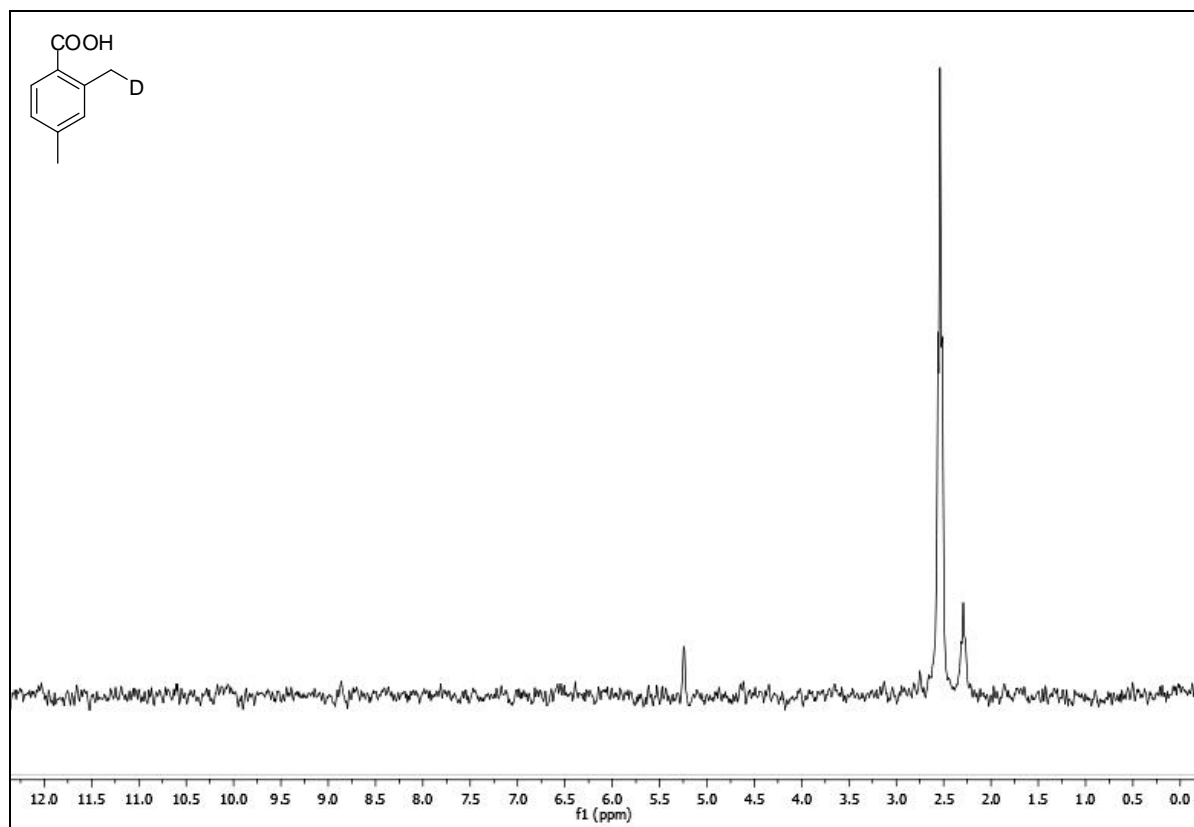



**4-(Deuteriomethyl)-2-(3-(deuteriomethyl)phenethyl)benzoic acid (D<sub>2</sub>-6f).**

<sup>1</sup>H NMR

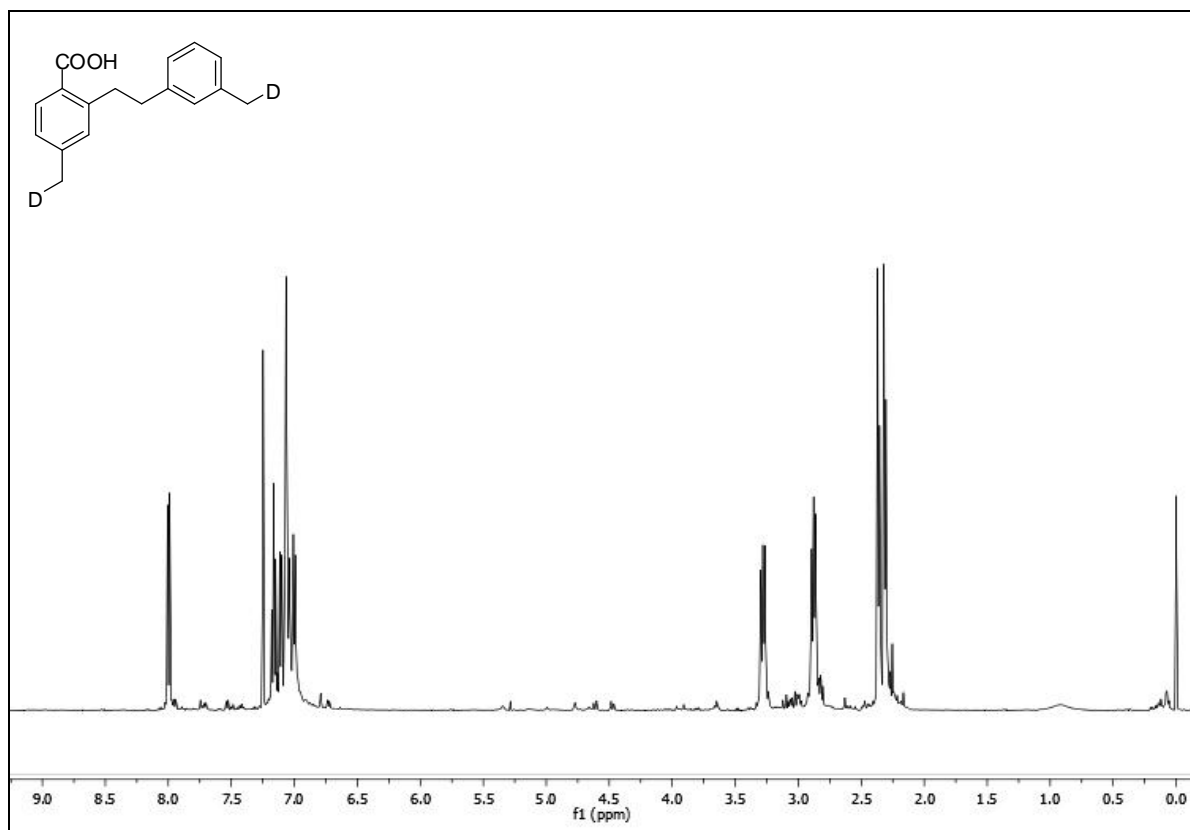

<sup>13</sup>C NMR

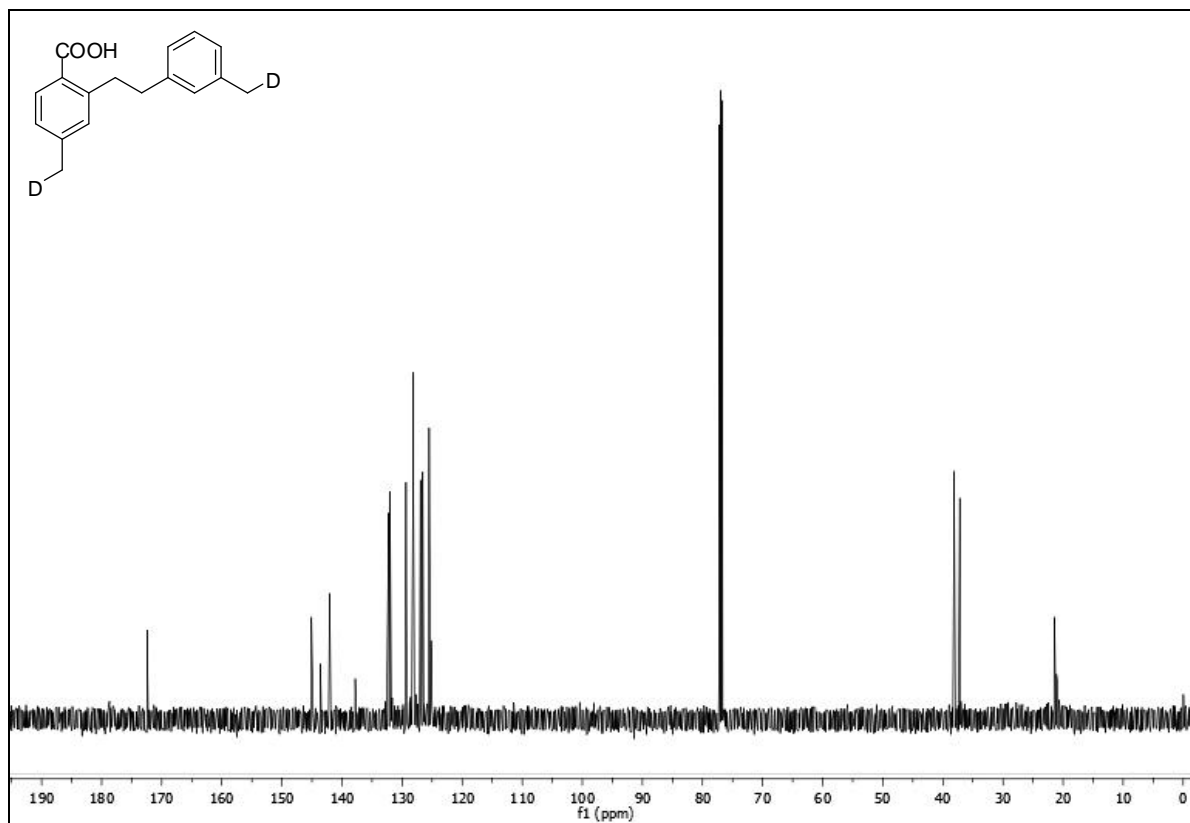

$^2\text{H}$  NMR ( $\text{CH}_2\text{Cl}_2$ )

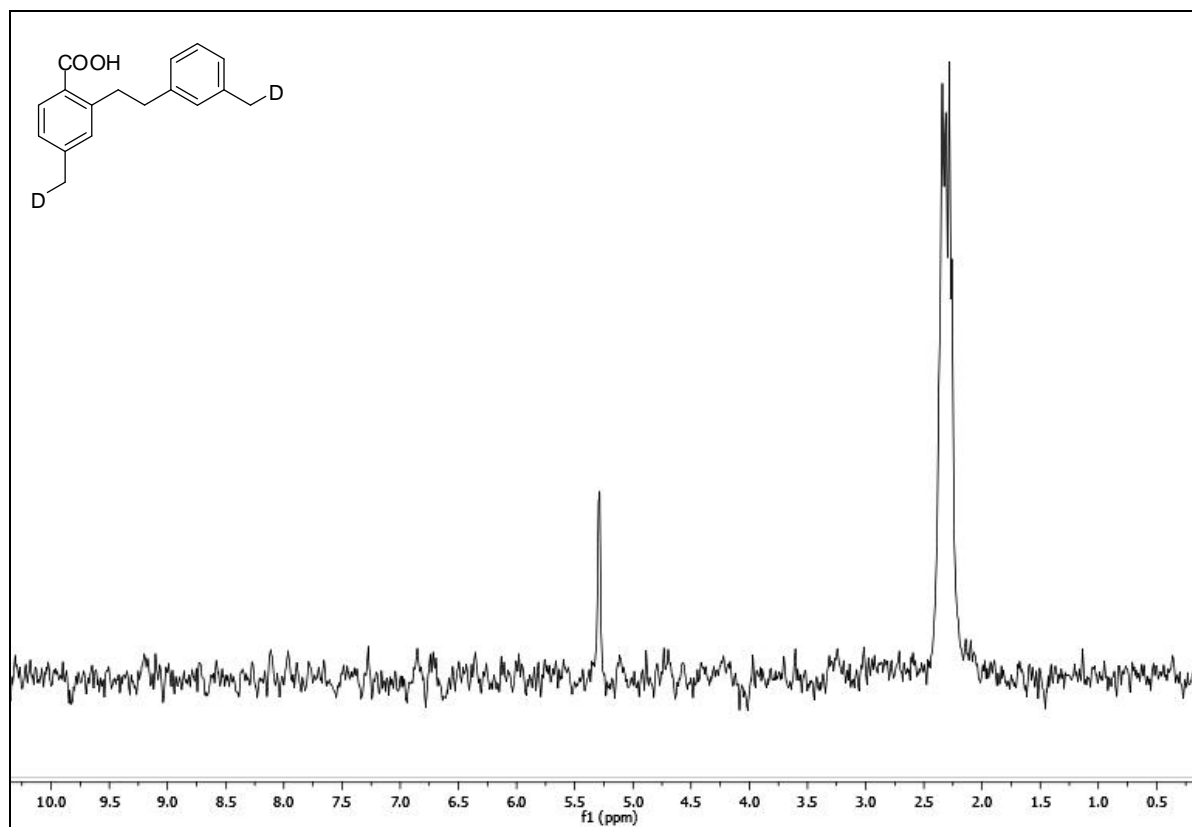

## X-Ray Structural Data for **8c**

Table 1. Crystal data and structure refinement for **8c**.

|                                   |                                             |                              |
|-----------------------------------|---------------------------------------------|------------------------------|
| Identification code               | <b>8c</b>                                   |                              |
| Empirical formula                 | $C_{18} H_{20} O_2$                         |                              |
| Formula weight                    | 268.34                                      |                              |
| Temperature                       | 100(2) K                                    |                              |
| Wavelength                        | 1.54184 Å                                   |                              |
| Crystal system                    | Monoclinic                                  |                              |
| Space group                       | P2 <sub>1</sub> /n (#14)                    |                              |
| Unit cell dimensions              | a = 6.5997(1) Å                             | $\alpha = 90^\circ$ .        |
|                                   | b = 8.9325(1) Å                             | $\beta = 105.621(2)^\circ$ . |
|                                   | c = 12.2214(2) Å                            | $\gamma = 90^\circ$ .        |
| Volume                            | 693.862(19) Å <sup>3</sup>                  |                              |
| Z                                 | 2                                           |                              |
| Density (calculated)              | 1.284 Mg/m <sup>3</sup>                     |                              |
| Absorption coefficient            | 0.645 mm <sup>-1</sup>                      |                              |
| F(000)                            | 288                                         |                              |
| Crystal size                      | 0.2018 x 0.0769 x 0.0564 mm <sup>3</sup>    |                              |
| Theta range for data collection   | 6.22 to 76.95°.                             |                              |
| Index ranges                      | -8 ≤ h ≤ 8, -11 ≤ k ≤ 11, -15 ≤ l ≤ 15      |                              |
| Reflections collected             | 9820                                        |                              |
| Independent reflections           | 1453 [R(int) = 0.0284]                      |                              |
| Completeness to theta = 76.95°    | 99.2 %                                      |                              |
| Absorption correction             | Analytical                                  |                              |
| Max. and min. transmission        | 0.969 and 0.904                             |                              |
| Refinement method                 | Full-matrix least-squares on F <sup>2</sup> |                              |
| Data / restraints / parameters    | 1453 / 0 / 132                              |                              |
| Goodness-of-fit on F <sup>2</sup> | 1.069                                       |                              |
| Final R indices [I > 2σ(I)]       | R1 = 0.0310, wR2 = 0.0805                   |                              |
| R indices (all data)              | R1 = 0.0342, wR2 = 0.0830                   |                              |
| Extinction coefficient            | 0.0062(11)                                  |                              |
| Largest diff. peak and hole       | 0.250 and -0.163 e.Å <sup>-3</sup>          |                              |

Table 2. Atomic coordinates ( $\times 10^4$ ) and equivalent isotropic displacement parameters ( $\text{\AA}^2 \times 10^3$ ) for **8c**. U(eq) is defined as one third of the trace of the orthogonalized  $U^{ij}$  tensor.

| Atom | x        | Y        | z       | U(eq) |
|------|----------|----------|---------|-------|
| C(1) | 10586(2) | 10321(1) | 7462(1) | 18(1) |
| O    | 11137(1) | 9984(1)  | 6484(1) | 22(1) |
| C(7) | 12811(2) | 10827(1) | 6252(1) | 24(1) |
| C(2) | 11702(1) | 11300(1) | 8298(1) | 18(1) |
| C(3) | 10924(2) | 11639(1) | 9226(1) | 18(1) |
| C(4) | 9001(1)  | 11037(1) | 9272(1) | 18(1) |
| C(5) | 8034(1)  | 9901(1)  | 8522(1) | 18(1) |
| C(8) | 6490(1)  | 8873(1)  | 8862(1) | 20(1) |
| C(9) | 7665(2)  | 7647(1)  | 9721(1) | 20(1) |
| C(6) | 8818(2)  | 9563(1)  | 7604(1) | 19(1) |

Table 3. Bond lengths [ $\text{\AA}$ ] and angles [ $^\circ$ ] for **8c**.

|                  |            |
|------------------|------------|
| C(1)–O           | 1.3727(12) |
| C(1)–C(2)        | 1.3950(14) |
| C(1)–C(6)        | 1.3997(14) |
| O–C(7)           | 1.4266(12) |
| C(7)–H(7A)       | 0.978(15)  |
| C(7)–H(7B)       | 0.990(14)  |
| C(7)–H(7C)       | 0.988(14)  |
| C(2)–C(3)        | 1.3985(14) |
| C(2)–H(2)        | 0.983(13)  |
| C(3)–C(4)        | 1.3939(13) |
| C(3)–C(9)#1      | 1.5115(13) |
| C(4)–C(5)        | 1.4008(13) |
| C(4)–H(4)        | 0.965(12)  |
| C(5)–C(6)        | 1.3900(13) |
| C(5)–C(8)        | 1.5104(13) |
| C(8)–C(9)        | 1.5698(14) |
| C(8)–H(8A)       | 1.009(13)  |
| C(8)–H(8B)       | 0.988(14)  |
| C(9)–C(3)#1      | 1.5115(13) |
| C(9)–H(9A)       | 0.987(13)  |
| C(9)–H(9B)       | 0.994(13)  |
| C(6)–H(6)        | 0.973(14)  |
| O–C(1)–C(2)      | 124.31(9)  |
| O–C(1)–C(6)      | 115.24(9)  |
| C(2)–C(1)–C(6)   | 120.41(9)  |
| C(1)–O–C(7)      | 117.24(8)  |
| O–C(7)–H(7A)     | 111.2(8)   |
| O–C(7)–H(7B)     | 105.5(8)   |
| H(7A)–C(7)–H(7B) | 109.5(11)  |

|                   |           |
|-------------------|-----------|
| O–C(7)–H(7C)      | 110.4(8)  |
| H(7A)–C(7)–H(7C)  | 110.2(11) |
| H(7B)–C(7)–H(7C)  | 109.9(11) |
| C(1)–C(2)–C(3)    | 119.53(9) |
| C(1)–C(2)–H(2)    | 120.2(8)  |
| C(3)–C(2)–H(2)    | 120.3(8)  |
| C(4)–C(3)–C(2)    | 119.13(9) |
| C(4)–C(3)–C(9)#1  | 119.16(8) |
| C(2)–C(3)–C(9)#1  | 120.37(9) |
| C(3)–C(4)–C(5)    | 120.81(9) |
| C(3)–C(4)–H(4)    | 120.2(7)  |
| C(5)–C(4)–H(4)    | 118.3(7)  |
| C(6)–C(5)–C(4)    | 118.88(9) |
| C(6)–C(5)–C(8)    | 121.03(9) |
| C(4)–C(5)–C(8)    | 118.84(8) |
| C(5)–C(8)–C(9)    | 111.07(7) |
| C(5)–C(8)–H(8A)   | 110.7(8)  |
| C(9)–C(8)–H(8A)   | 108.3(7)  |
| C(5)–C(8)–H(8B)   | 110.1(8)  |
| C(9)–C(8)–H(8B)   | 108.3(8)  |
| H(8A)–C(8)–H(8B)  | 108.2(11) |
| C(3)#1–C(9)–C(8)  | 110.78(8) |
| C(3)#1–C(9)–H(9A) | 111.3(7)  |
| C(8)–C(9)–H(9A)   | 107.4(7)  |
| C(3)#1–C(9)–H(9B) | 110.6(7)  |
| C(8)–C(9)–H(9B)   | 108.2(7)  |
| H(9A)–C(9)–H(9B)  | 108.4(10) |
| C(5)–C(6)–C(1)    | 119.92(9) |
| C(5)–C(6)–H(6)    | 121.0(8)  |
| C(1)–C(6)–H(6)    | 119.0(7)  |

Symmetry transformations used to generate equivalent atoms:

#1  $-x+2, -y+2, -z+2$

Table 4. Anisotropic displacement parameters ( $\text{\AA}^2 \times 10^3$ ) for **8c**. The anisotropic displacement factor exponent takes the form:  $-2\pi^2 [h^2 a^{*2} U^{11} + \dots + 2 h k a^* b^* U^{12}]$

| Atom | $U^{11}$ | $U^{22}$ | $U^{33}$ | $U^{23}$ | $U^{13}$ | $U^{12}$ |
|------|----------|----------|----------|----------|----------|----------|
| C(1) | 20(1)    | 19(1)    | 16(1)    | 3(1)     | 5(1)     | 4(1)     |
| O    | 25(1)    | 24(1)    | 19(1)    | −1(1)    | 10(1)    | −3(1)    |
| C(7) | 23(1)    | 28(1)    | 23(1)    | 2(1)     | 10(1)    | −1(1)    |
| C(2) | 17(1)    | 18(1)    | 19(1)    | 4(1)     | 4(1)     | 1(1)     |
| C(3) | 19(1)    | 14(1)    | 18(1)    | 2(1)     | 3(1)     | 1(1)     |
| C(4) | 18(1)    | 17(1)    | 17(1)    | 1(1)     | 4(1)     | 3(1)     |
| C(5) | 15(1)    | 19(1)    | 17(1)    | 3(1)     | 2(1)     | 2(1)     |
| C(8) | 17(1)    | 23(1)    | 18(1)    | −1(1)    | 3(1)     | −3(1)    |
| C(9) | 21(1)    | 19(1)    | 19(1)    | −1(1)    | 6(1)     | −4(1)    |
| C(6) | 19(1)    | 19(1)    | 16(1)    | 0(1)     | 2(1)     | 0(1)     |

Table 5. Hydrogen coordinates ( $\times 10^4$ ) and isotropic displacement parameters ( $\text{\AA}^2 \times 10^3$ ) for **8c**.

| Atom  | x         | y         | z        | U(eq) |
|-------|-----------|-----------|----------|-------|
| H(7A) | 14170(20) | 10552(16) | 6771(12) | 31(3) |
| H(7B) | 12800(20) | 10564(16) | 5464(12) | 29(3) |
| H(7C) | 12560(20) | 11911(16) | 6306(11) | 28(3) |
| H(2)  | 13030(20) | 11742(15) | 8237(11) | 24(3) |
| H(4)  | 8424(19)  | 11279(14) | 9897(10) | 18(3) |
| H(8A) | 5540(20)  | 9457(15)  | 9233(10) | 22(3) |
| H(8B) | 5600(20)  | 8363(15)  | 8185(12) | 27(3) |
| H(9A) | 6582(19)  | 7011(14)  | 9909(10) | 20(3) |
| H(9B) | 8501(19)  | 7018(15)  | 9332(11) | 23(3) |
| H(6)  | 8180(20)  | 8784(15)  | 7064(11) | 25(3) |

Table 6. Torsion angles [ $^\circ$ ] for **8c**.

|                       |            |
|-----------------------|------------|
| C(2)–C(1)–O–C(7)      | –7.73(13)  |
| C(6)–C(1)–O–C(7)      | 174.51(8)  |
| O–C(1)–C(2)–C(3)      | 175.86(8)  |
| C(6)–C(1)–C(2)–C(3)   | –6.48(14)  |
| C(1)–C(2)–C(3)–C(4)   | –2.64(14)  |
| C(1)–C(2)–C(3)–C(9)#1 | 164.04(9)  |
| C(2)–C(3)–C(4)–C(5)   | 11.60(14)  |
| C(9)#1–C(3)–C(4)–C(5) | –155.24(9) |
| C(3)–C(4)–C(5)–C(6)   | –11.29(14) |
| C(3)–C(4)–C(5)–C(8)   | 156.10(9)  |
| C(6)–C(5)–C(8)–C(9)   | 88.51(10)  |
| C(4)–C(5)–C(8)–C(9)   | –78.59(11) |
| C(5)–C(8)–C(9)–C(3)#1 | 58.44(10)  |
| C(4)–C(5)–C(6)–C(1)   | 2.02(14)   |
| C(8)–C(5)–C(6)–C(1)   | –165.08(9) |
| O–C(1)–C(6)–C(5)      | –175.34(8) |
| C(2)–C(1)–C(6)–C(5)   | 6.80(14)   |

Symmetry transformations used to generate equivalent atoms:

#1  $-x+2, -y+2, -z+2$
